# Supplementary material
Source: Royal Society of Chemistry journal article supplement (doi:10.1039/d5ta07747h)
Supplement: d5ta07747h1.pdf [file d5ta07747h1.pdf]

## Supporting Information

### Decorating Zn-MOF-74 on ZIF-8 to Increase Gas Transport and Plasticization Resistance in Mixed-Matrix Membranes

Jin Hui Jo<sup>a</sup>, Jieun Lee<sup>a</sup>, Eun Ji An<sup>a</sup>, Hyomin Choi<sup>a</sup>, Hyunmo Jae<sup>b,c</sup>, Yubin Lee<sup>d</sup>, Miso Kang<sup>d</sup>, Jaesung Park<sup>d</sup>, Hyuk Taek Kwon<sup>e</sup>, Chanmin Lee<sup>f,g</sup>, Dongkyu Rho<sup>\*c</sup>, and Won Seok Chi<sup>\*a,h</sup>

<sup>a</sup>Department of Polymer Engineering, Graduate School, Chonnam National University, 77 Yongbong-ro, Bukgu, Gwangju 61186, Republic of Korea

<sup>b</sup>Department of Chemical and Biochemical Engineering, Yonsei University, 50 Yonsei-ro, Seodaemun-gu, Seoul 03722, Republic of Korea

<sup>c</sup>Energy & Environment Division, Korea Institute of Ceramic Engineering and Technology (KICET) 101, Soho-ro, Jinju-si, Gyeongsangnam-do 52851, Republic of Korea

<sup>d</sup>Chemical & Process Technology Division, Korea Research Institute of Chemical Technology (KRICT), 141, Gajeongro, Yuseong, Daejeon 34114, Republic of Korea

<sup>e</sup>Department of Chemical Engineering, Pukyong National University, 45 Youngso-ro, Nam-gu, Busan 48513, Republic of Korea

<sup>f</sup>Green Circulation R&D Department, Research Institute of Sustainable Development Technology, Korea Institute of Industrial Technology, 89 Yangdaegiro-gil, Irgan-myeon, Seobuk-gu, Cheonan-si 31056, Chungcheongnam-do, Republic of Korea

<sup>g</sup>Department of Chemical Engineering, Chung-Ang University, 84 Heokseok-ro, Dongjak-gu, Seoul 31056, Republic of Korea

<sup>h</sup>School of Polymer Science and Engineering, Chonnam National University, 77 Yongbong-ro, Buk-gu, Gwangju 61186, Korea, Email: [wschi@jnu.ac.kr](mailto:wschi@jnu.ac.kr)

\*Corresponding authors

E-mail: [rohdk@kicet.re.kr](mailto:rohdk@kicet.re.kr); [wschi@jnu.ac.kr](mailto:wschi@jnu.ac.kr)

## Contents

|                                                                                                |     |
|------------------------------------------------------------------------------------------------|-----|
| <b>Gas permeation parameter estimation</b>                                                     | S4  |
| <b>Mixed gas separation performance test</b>                                                   | S6  |
| <b>Error Propagation</b>                                                                       | S7  |
| <b>Synthesis of Zn-MOF-74 nanoparticles</b>                                                    | S8  |
| <b>Fig. S1.</b> The crystal structures of ZIF-8 and Zn-MOF-74                                  | S9  |
| <b>Fig. S2.</b> FE-SEM images of micron-sized Zn-MOF-74 particles                              | S10 |
| <b>Fig. S3.</b> FT-IR spectra for ZIF-8 and series of ZIF-8@MOF-74 nanoparticles               | S11 |
| <b>Fig. S4.</b> Pore size distributions for ZIF-8 and series of ZIF-8@MOF-74 nanoparticles     | S12 |
| <b>Fig. S5.</b> Optical images of ZIF-8, series of ZIF-8@MOF-74 and Zn-MOF-74 powders          | S13 |
| <b>Fig. S6.</b> EDS mapping images of ZIF-8 and series of ZIF-8@MOF-74 nanoparticles           | S14 |
| <b>Fig. S7.</b> HAADF-TEM images of ZIF-8@MOF-74-3 nanoparticles                               | S15 |
| <b>Fig. S8.</b> HAADF-STEM, EDS images and line scan spectrum of ZIF-8@MOF74-3 nanoparticles   | S16 |
| <b>Fig. S9.</b> EELS spectra of ZIF-8 and ZIF-8@MOF-74-3 nanoparticles                         | S17 |
| <b>Fig. S10.</b> Gas sorption isotherms for ZIF-8 and ZIF-8@MOF-74-3 nanoparticles             | S18 |
| <b>Fig. S11.</b> TGA curves for ZIF-8, series of ZIF-8@MOF-74 nanoparticles and MMMs           | S19 |
| <b>Fig. S12.</b> FT-IR spectra for 6FDD membrane and MMMs                                      | S20 |
| <b>Fig. S13.</b> Optical images of 20wt% MMMs                                                  | S21 |
| <b>Fig. S14.</b> Cross-sectional SEM images and optical images of the 6FDD polyimide membrane. | S22 |
| <b>Fig. S15.</b> Cross-sectional SEM images of the bottom surfaces of the MMMs.                | S23 |
| <b>Fig. S16.</b> Compatibility test between MOF and polymer solution                           | S24 |
| <b>Fig S17.</b> XPS spectra for MMMs                                                           | S25 |
| <b>Fig. S18.</b> DSC curves of MMMs.                                                           | S27 |
| <b>Fig. S19.</b> Gas separation performances with upper bounds limits                          | S28 |
| <b>Fig. S20.</b> Diffusivity and solubility parameters for the 6FDD membrane and MMMs          | S29 |
| <b>Fig. S21.</b> Arrhenius plots of CO <sub>2</sub> permeability for pristine 6FDD and MMMs    | S30 |

|                                                                                                                                                      |     |
|------------------------------------------------------------------------------------------------------------------------------------------------------|-----|
| <b>Fig. S22.</b> Long-term gas permeability of pristine 6FDD and MMMs                                                                                | S32 |
| <b>Maxwell model calculations</b>                                                                                                                    | S33 |
| <b>Fig. S23.</b> Maxwell model predictions for MMMs                                                                                                  | S34 |
| <b>Fig. S24.</b> Gas separation performances compared to previously reported data                                                                    | S36 |
| <b>Table S1.</b> Actual MOF weights in the MMMs with MOF weight loadings                                                                             | S37 |
| <b>Table S2.</b> Mechanical properties of the pure 6FDD and MMMs                                                                                     | S38 |
| <b>Table S3.</b> Diffusivity parameters for 6FDD membrane and MMMs                                                                                   | S39 |
| <b>Table S4.</b> Solubility parameters for 6FDD membrane and MMMs                                                                                    | S40 |
| <b>Table S5.</b> CO <sub>2</sub> /N <sub>2</sub> and CO <sub>2</sub> /CH <sub>4</sub> sorption selectivity of ZIF-8 and ZIF-8@MOF-74-3 nanoparticles | S41 |
| <b>Table S6.</b> Pure- and mixed-gas performance of 6FDD and 20 wt% ZIF-8@MOF-74-1/6FDD MMM                                                          | S42 |
| <b>Table S7.</b> Gas separation performances compared to previously reported data                                                                    | S43 |
| <b>References</b>                                                                                                                                    | S46 |

## Gas permeation parameter estimation

Pure gas permeability ( $P$ ) can be calculated as follows:

$$P = \frac{Vl}{p_2ART} \left[ \left( \frac{dp}{dt} \right)_{ss} - \left( \frac{dp}{dt} \right)_{leak} \right] \quad (\text{S1})$$

where  $P$  is the pure gas permeability (Barrer ( $10^{-10} \cdot \text{cm}^3(\text{STP}) \cdot \text{cm} \cdot \text{cm}^{-2} \cdot \text{s}^{-1} \cdot \text{cmHg}^{-1}$ )),  $V$  is the downstream volume ( $\text{cm}^3$ ),  $l$  is the average thickness of the membrane (cm),  $p_2$  is the upstream pressure (cmHg),  $A$  is the active area of the membrane ( $\text{cm}^2$ ),  $R$  is the ideal gas constant,  $T$  is the temperature (K),  $(dp/dt)_{ss}$  is the steady-state permeation rate (cmHg/s), and  $(dp/dt)_{leak}$  is the leak rate (cmHg/s).

The ideal gas selectivity ( $\alpha_{A/B}$ ) for pure gases A and B can be determined by using the following equation:

$$\alpha_{A/B} = \frac{P_A}{P_B}, \quad (\text{S2})$$

where  $P_A$  and  $P_B$  are the gas permeability values for pure gas species A and B, respectively.

Diffusivity, which is associated with the kinetic diameter and gas transport properties, and solubility, which represents the thermodynamic contribution to gas transport, were also determined to compare the performances of the ZIF-8 and series of ZIF-8@MOF-74 based MMMs. These are respectively defined as follows:

$$D = \frac{l^2}{6\theta} \quad (\text{S3})$$

where  $D$  represents the diffusivity ( $\text{cm}^2/\text{s}$ ),  $l$  represents the thickness of the membrane (cm), and  $\theta$  represents the time lag (s).

$$P = D \times S \quad (\text{S4})$$

where  $P$  is the pure gas permeability (Barrer),  $D$  is the diffusivity ( $\text{cm}^2/\text{s}$ ), and  $S$  is the solubility ( $\text{cm}^3(\text{STP})/\text{cm}^3 \cdot \text{atm}$ ).

The respective diffusivity-selectivity ( $\alpha_{A/B}(D)$ ) and solubility-selectivity ( $\alpha_{A/B}(S)$ ) values for gas species  $A$  and  $B$  can also be estimated as follows:

$$\alpha_{A/B}(D) = \frac{D_A}{D_B} \quad (\text{S5})$$

$$\alpha_{A/B}(S) = \frac{S_A}{S_B} \quad (\text{S6})$$

where  $D_A$  and  $D_B$  are the diffusivity ( $\text{cm}^2/\text{s}$ ), and  $S_A$  and  $S_B$  are the solubility ( $\text{cm}^3(\text{STP})/\text{cm}^3 \cdot \text{atm}$ ) for gas species  $A$  and  $B$ , respectively.

### **Mixed-gas separation performance test**

Membrane films were masked with epoxy (Devcon 20845, Danvers, MA, USA) on a copper plate (5.0 cm in diameter). The effective permeation area was approximately 2.0 cm<sup>2</sup>, which was determined by digital image analysis using ImageJ software. The thickness of the membrane films was approximately 60-70  $\mu\text{m}$ , as measured with a digital micrometer (547-401, Mitutoyo, Japan). Mixed-gas permeation measurements were performed using a modified constant pressure, variable volume method. An equimolar CO<sub>2</sub>/CH<sub>4</sub> mixture was tested at 4 atm and 25 °C, with upstream flow rates regulated by mass flow controllers (5850E Series, Brooks Instrument, PA, USA). Helium was used as a carrier gas to sweep the permeate gas to a gas chromatograph (DS6200, Donam Instruments, Korea) equipped with a thermal conductivity detector. The downstream flow rate was measured using a flow gauge. To minimize concentration polarization at the membrane film surface, the stage cut was maintained below 1 % during all mixed-gas measurements. In addition, for comparison purposes, the pure-gas permeabilities of CO<sub>2</sub> and CH<sub>4</sub> were measured at 2 atm and 25 °C using the same apparatus.

## Error propagation

The uncertainty of permeability coefficients ( $\sigma_p$ ) is determined as follows:

$$\sigma_p = P \sqrt{\left(\frac{\sigma_{V_D}}{V_D}\right)^2 + \left(\frac{\sigma_l}{l}\right)^2 + \left(\frac{\sigma_{p_2}}{p_2}\right)^2 + \left(\frac{\sigma_T}{T}\right)^2 + \left(\frac{\sigma_A}{A}\right)^2 + \Delta^2} \quad (\text{S7})$$

In **Eq. S7**, the relative uncertainty of the downstream volume ( $\frac{\sigma_{V_D}}{V_D}$ ) is assumed to be 3%; the uncertainty of the membrane thickness ( $\sigma_l$ ) is determined by calculating the standard deviation of seven measurements of the membrane thickness ( $l$ ), the uncertainty of the upstream pressure ( $\sigma_{p_2}$ ), as reported by the downstream transducer and specified by the manufacturer, is fixed at 0.05 psi,  $p_2$  is fixed at 15 psi; the uncertainty in the active area ( $\sigma_A$ ) was estimated using the standard deviation from 10 measurements and the uncertainty in temperature ( $\sigma_T$ ) was considered negligible due to excellent control maintaining the deviation within 0.01 K from the target temperature and the relative uncertainty ( $\left[\left(\frac{dp}{dt}\right)_{ss} - \left(\frac{dp}{dt}\right)_{leak}\right]$  denoted as  $\Delta$ ) is assumed to be 1%.

### **Synthesis of Zn-metal organic framework (MOF)-74 nanoparticles**

These were synthesized according to the method reported in reference [1] Briefly, zinc nitrate hexahydrate (0.452 g) and 2,5-dihydroxyterephthalic acid (DHTA) (0.1 g) were dissolved in 12 mL of dimethyl formamide (DMF)/ethanol (EtOH)/deionized (DI) water (10/1/12, v/v/v). The solution was sealed in a 50 mL Teflon-lined autoclave and heated at 110 °C for 20 h. The product was collected by centrifugation and washed with DMF and methanol (MeOH) three times each. The obtained Zn-MOF-74 nanoparticles were dried in an oven at 60 °C overnight, twice, to remove any residual solvents.

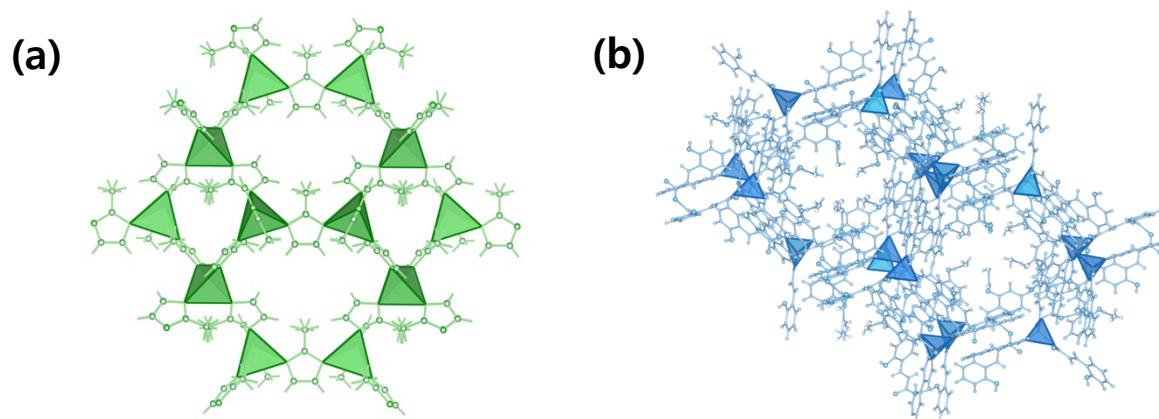

**Fig. S1.** The crystal structures of (a) zeolitic imidazolate framework-8 (ZIF-8) and (b) Zn-MOF-74. The crystallographic data were obtained from references [2] and [3] using CIF files sourced from the Crystallography Open Database.

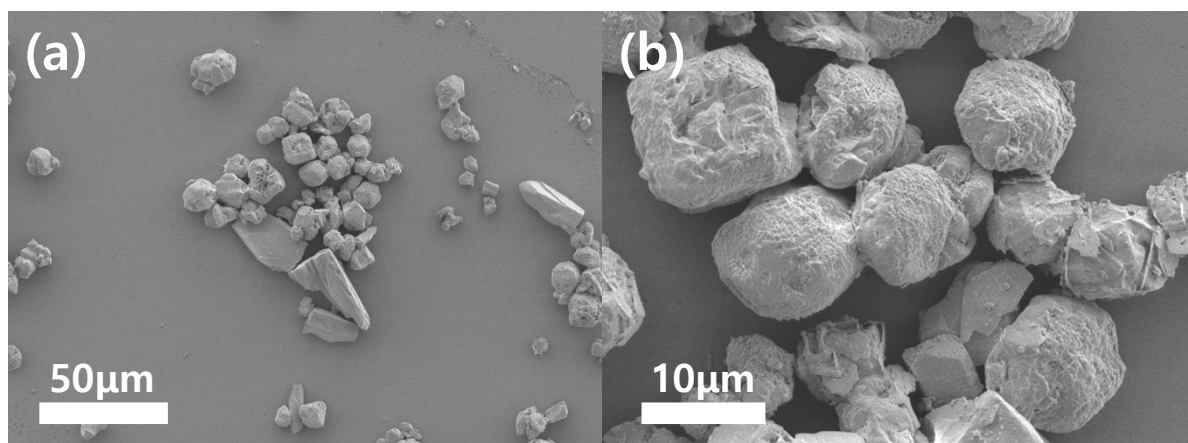

**Fig. S2.** FE-SEM images of micron-sized Zn-MOF-74 particles at (a) low resolution and (b) high resolution.

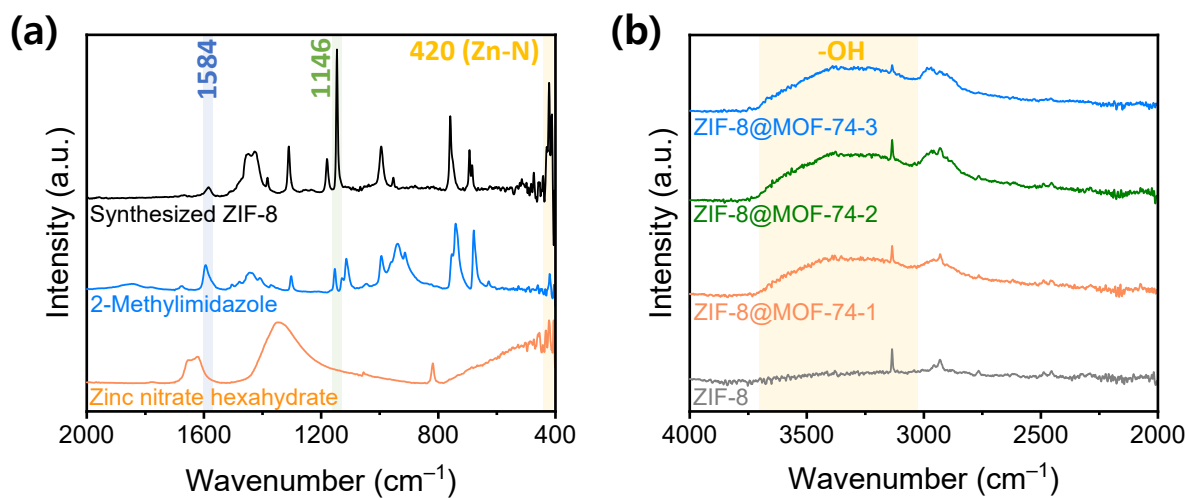

**Fig. S3.** (a) FT-IR spectra for 2-methylimidazole, zinc nitrate hexahydrate, and ZIF-8 nanoparticles and (b) ZIF-8 and ZIF-8@MOF-74 nanoparticles in the wavenumber ranges from 4000-380  $\text{cm}^{-1}$  and 4000-2000  $\text{cm}^{-1}$ , respectively.

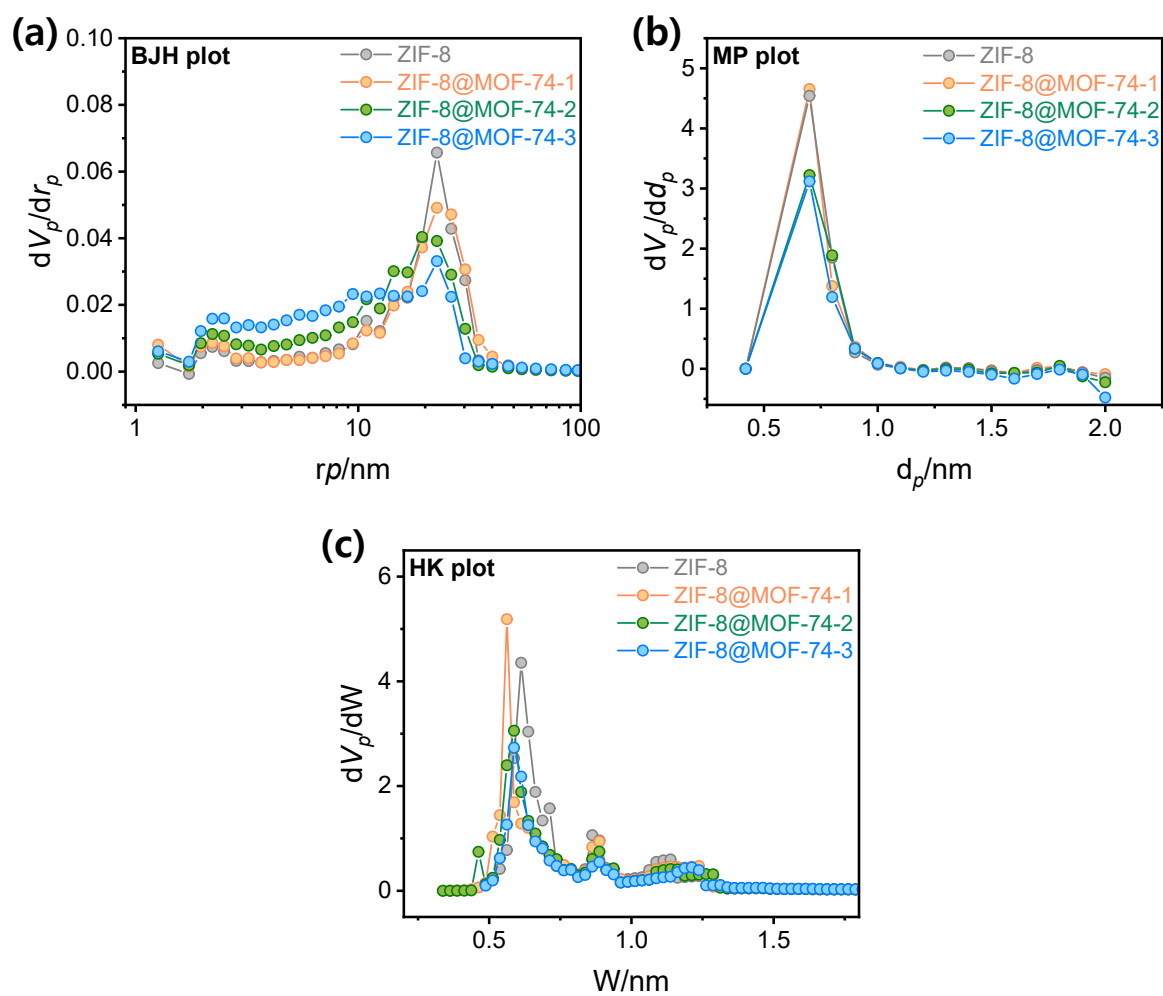

**Fig. S4.** Pore size distributions for ZIF-8 and series of ZIF-8@MOF-74 nanoparticles (a) Barrett-Joyner-Halenda (BJH) plots, (b) Micropore (MP) plots, and (c) Horvath-Kawazoe (HK) plots.

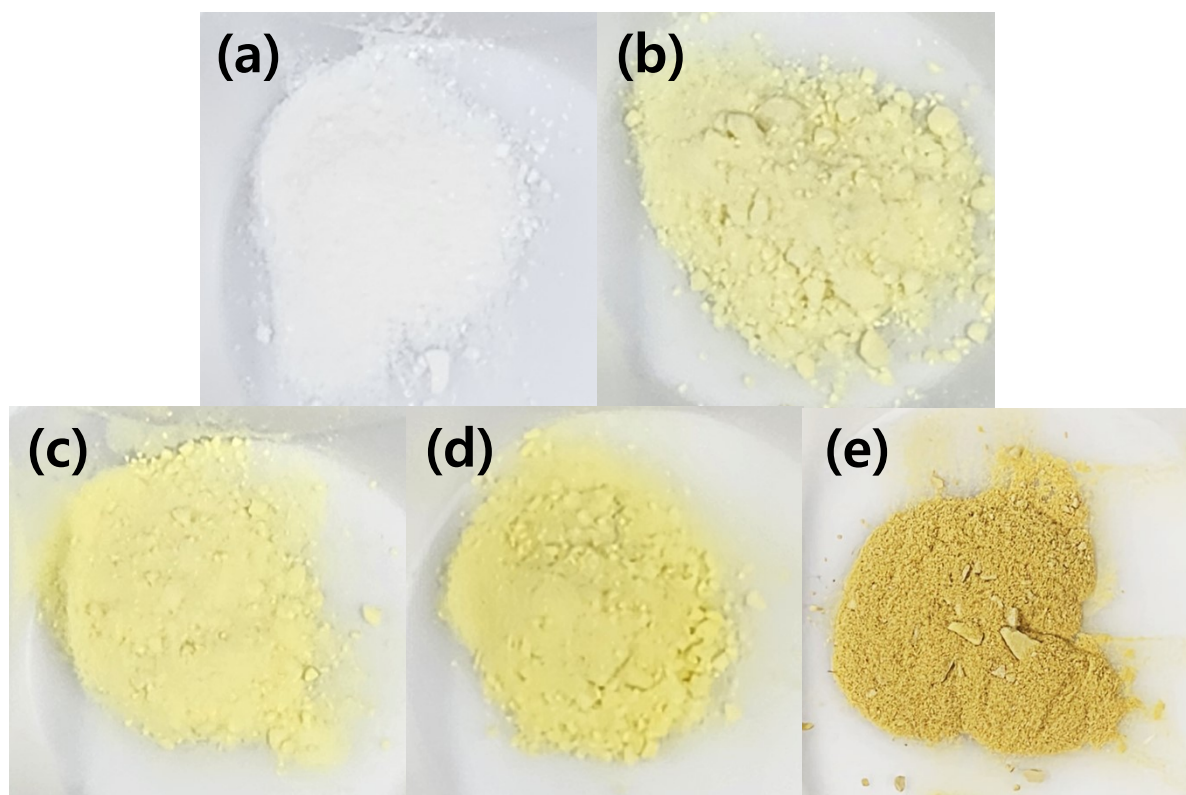

**Fig. S5.** Optical images of (a) ZIF-8, (b) ZIF-8@MOF-74-1, (c) ZIF-8@MOF-74-2, (d) ZIF-8@MOF-74-3 and (e) Zn-MOF-74 samples. ZIF-8@MOF-74-1, ZIF-8@MOF-74-2, and ZIF-8@MOF-74-3 were synthesized with ZIF-8/DHTA concentration ratios of 18:1, 12:1, and 6:1, respectively.

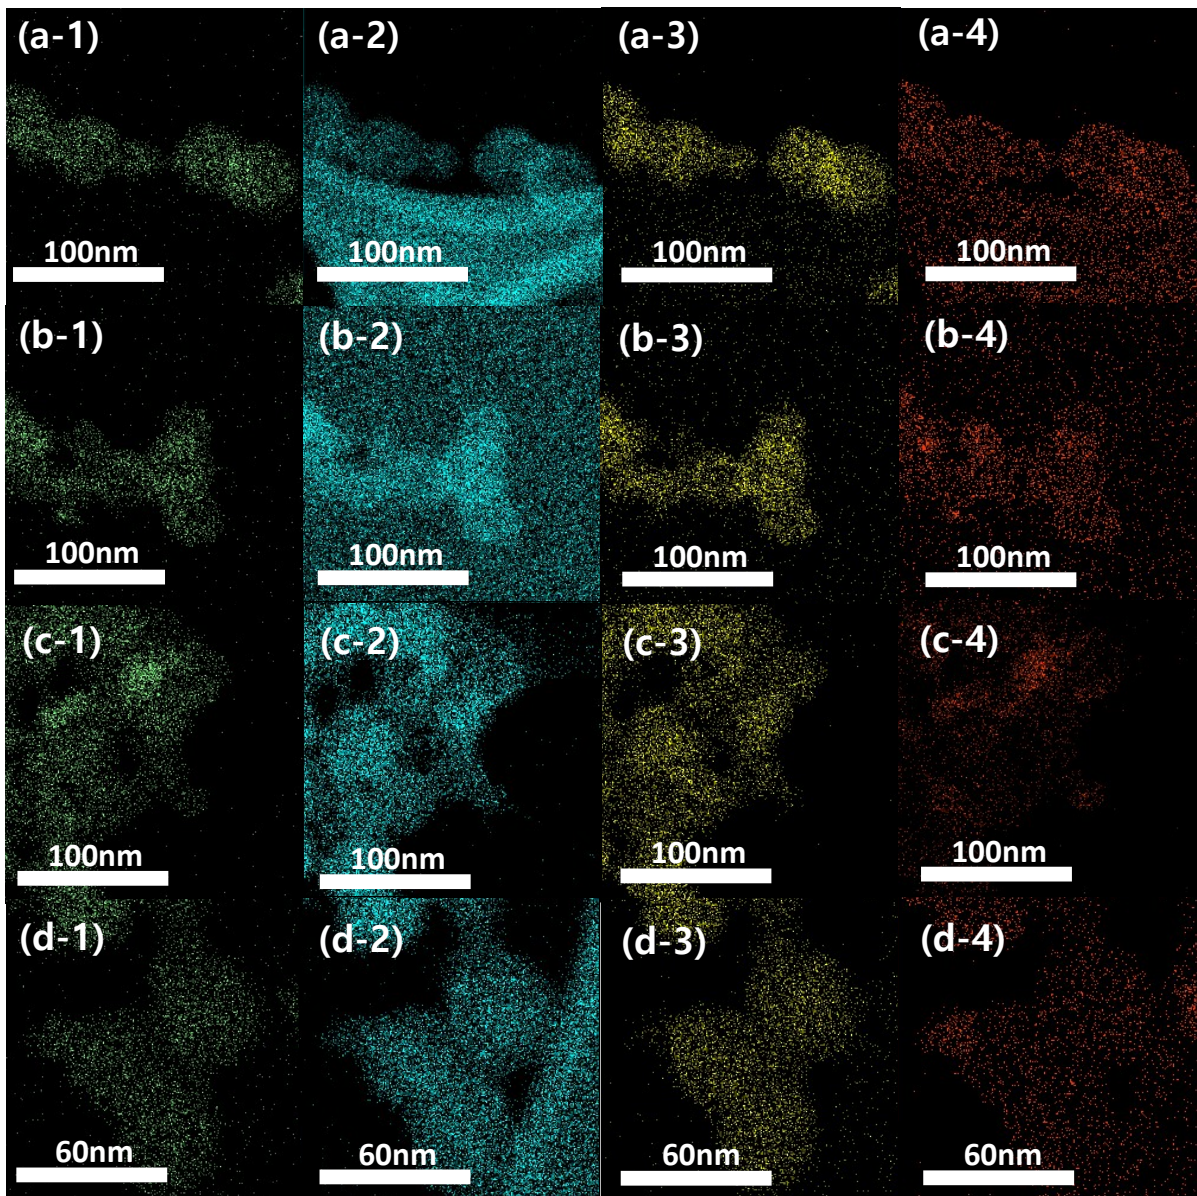

**Fig. S6.** EDS mapping images of (a) ZIF-8, (b) ZIF-8@MOF-74-1, (c) ZIF-8@MOF-74-2, and (d) ZIF-8@MOF-74-3: 1 = Zn, 2 = C, 3 = N, and 4 = O.

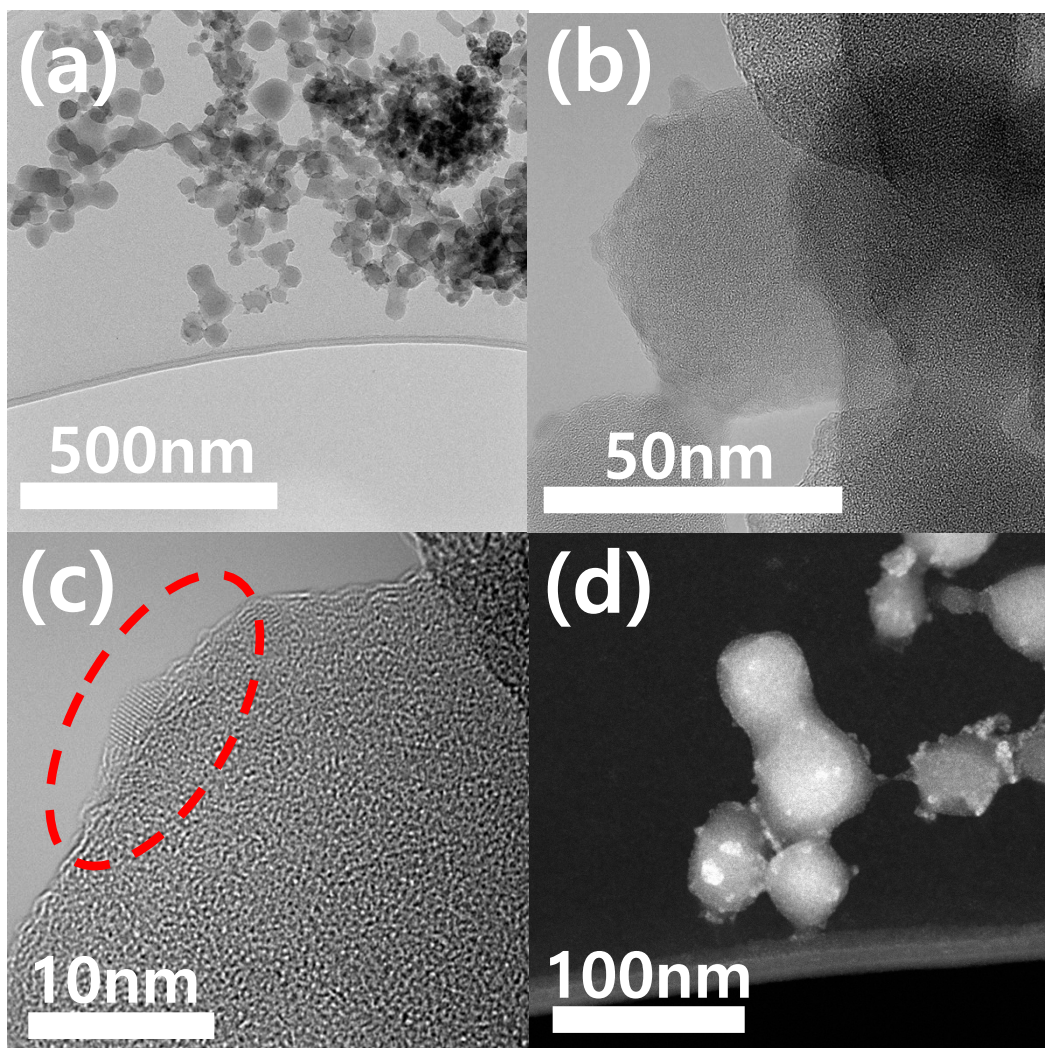

**Fig. S7.** HAADF-TEM images of ZIF-8@MOF-74-3 nanoparticles with (a) low resolution and (b, c) high resolution images and (d) Scanning TEM (STEM) image.

The low-magnification HAADF-TEM image (**Fig. S7a**) reveals small nanoparticles decorating the surface of a larger core particle. The high-magnification HAADF-TEM and STEM images (**Fig. S7b-d**) clearly illustrate the distinct lattice boundary at the ZIF-8 and MOF-74 interface, providing direct evidence of Zn-MOF-74 growth on the ZIF-8 surface [4,5].

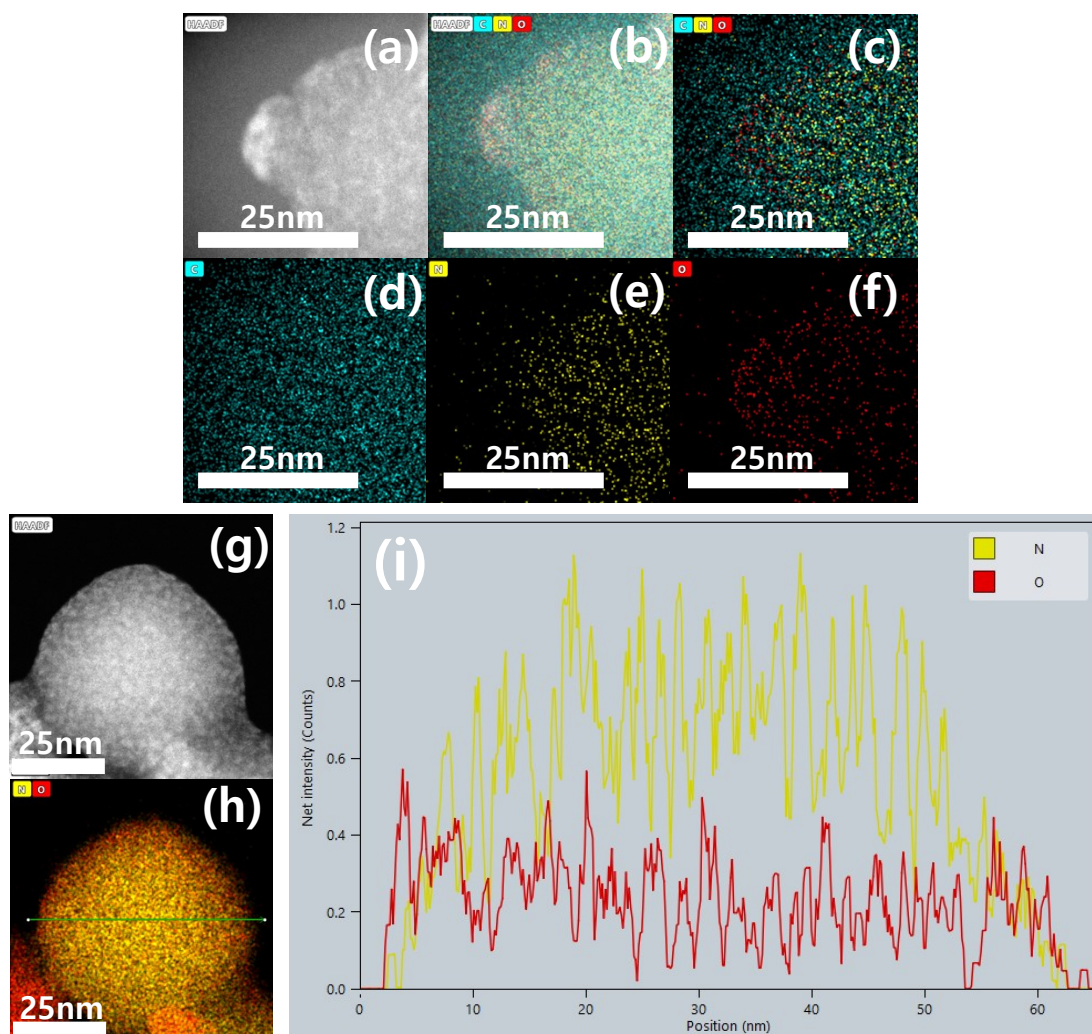

**Fig. S8.** (a, g) HAADF-STEM images of ZIF-8@MOF-74-3 nanoparticles. (b, c) HAADF-STEM images overlaid with EDS elemental mapping images of C (cyan), N (green), and O (red). (d-f) Individual EDS elemental mapping images of (d) C, (e) N, and (f) O, (h) STEM-EDS elemental overlay image showing the line-scan path for N (yellow) and O (red). (i) EDS line-scan profiles of ZIF-8@MOF-74-3 nanoparticles.

HAADF-EDS elemental mapping of the same nanoparticle (**Fig. S8a-f**) shows a strong oxygen signal confined to the decorating Zn-MOF-74, while zinc and carbon are distributed throughout. Quantitative line-scan profiles across the nanoparticle (**Fig. S8g-i**) further confirm the morphology. Nitrogen (in 2MeIM) is concentrated in the core, whereas oxygen (in DHTA) is enriched at the surface.

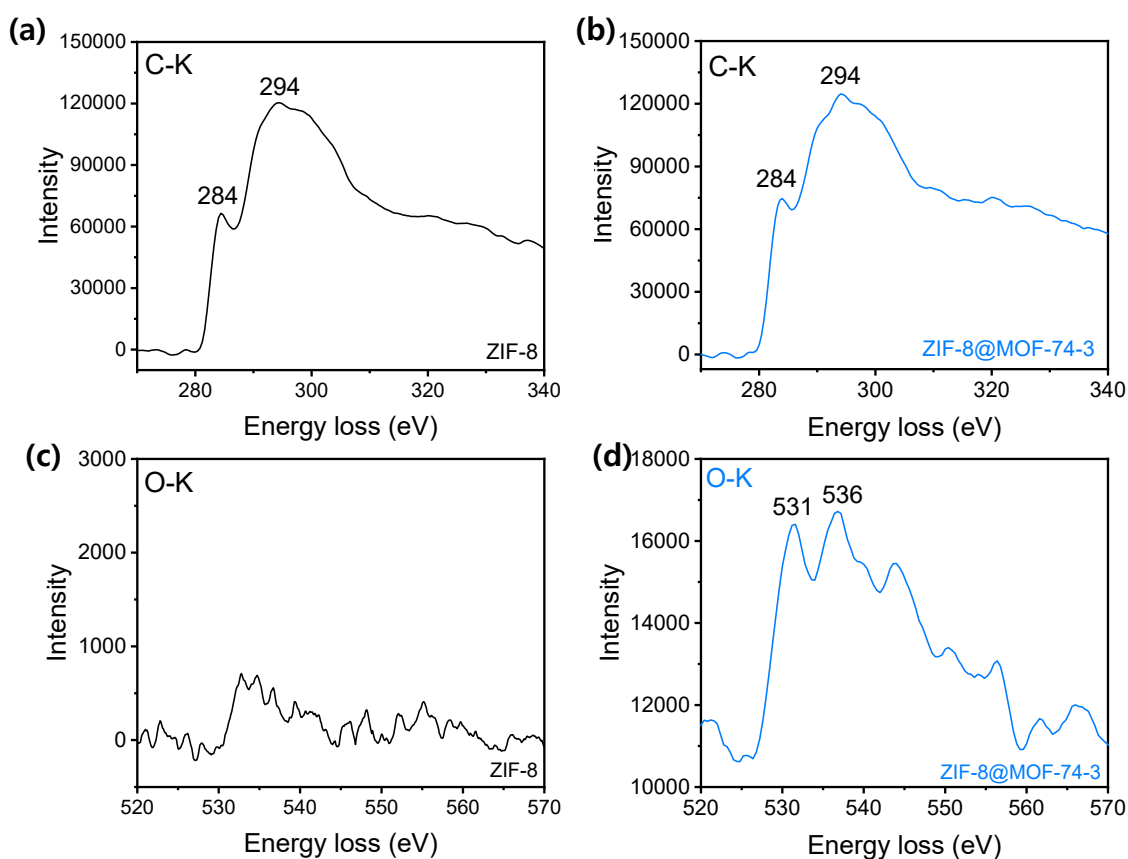

**Fig. S9.** Electron energy loss spectroscopy (EELS) spectra of (a,c) pristine ZIF-8 and (b,d) ZIF-8@MOF-74-3 for (a, b) C-K and (c, d) O-K edge evolution.

For deeper structure insight, electron energy-loss spectroscopy (EELS) was conducted on pristine ZIF-8 and ZIF-8@MOF-74-3 (**Fig. S9**). The C-K edges (**Fig. S9a,b**) exhibit similar  $\pi^*$  features at  $\sim 284$  eV (C=N and C=C bonds) for both samples, confirming the existence of the ZIF-8 despite the formation of the Zn-MO-74. Notably, the O-K edge of ZIF-8 (**Fig. S9c**) shows negligible intensity (520-550 eV), attributable to trace adsorbed H<sub>2</sub>O or contamination, consistent with its oxygen-free composition. In contrast, ZIF-8@MOF-74-3 (**Fig. S9d**) show more than  $\sim 8$ -fold intensity increase, with a prominent pre-edge peak at  $\sim 531$  eV assigned to  $1s$  to  $\sigma^*$  transitions in Zn-O and  $-\text{COO}^-$  moieties show definitive evidence of Zn-MOF-74 formation on the ZIF-8 surface [6].

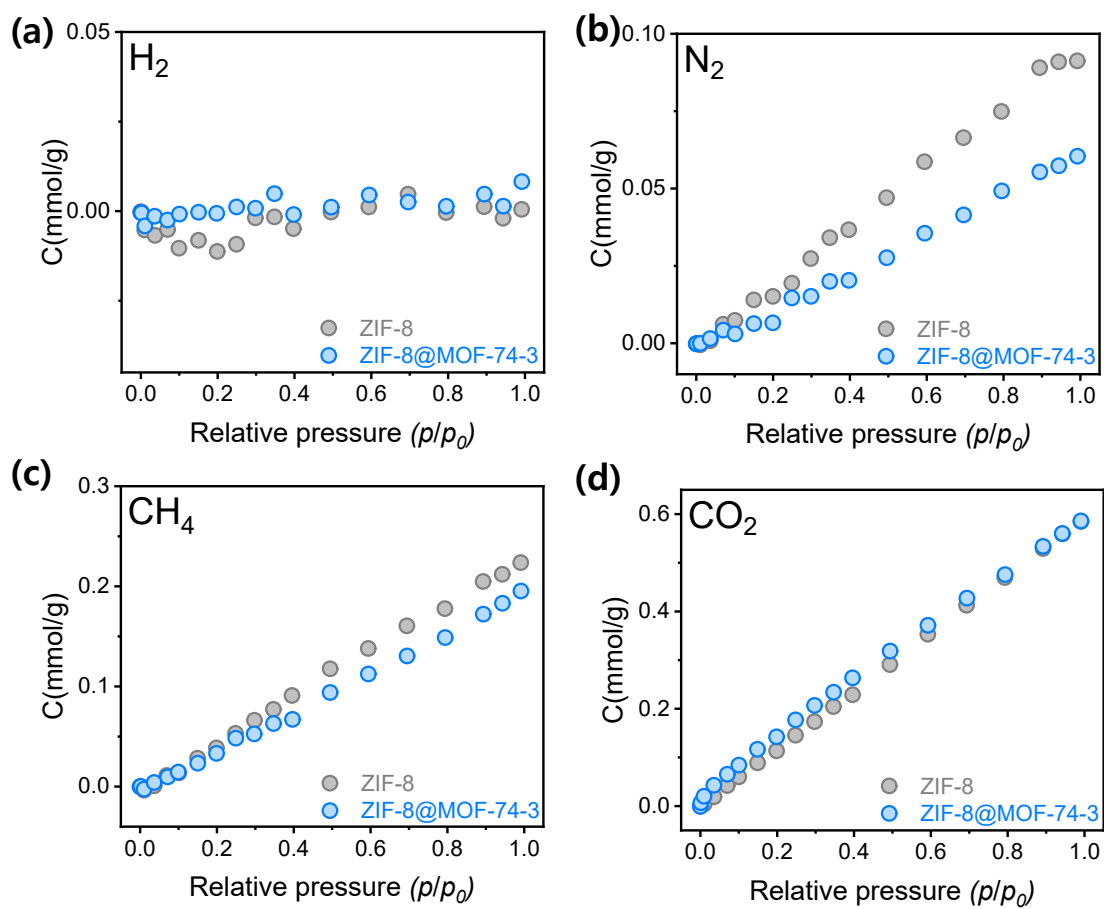

**Fig. S10.** (a)  $H_2$ , (b)  $N_2$ , (c)  $CH_4$ , and (d)  $CO_2$  gas sorption isotherms at 308.15K for ZIF-8 (Grey) and ZIF-8@MOF-74-3 (Blue) nanoparticles.

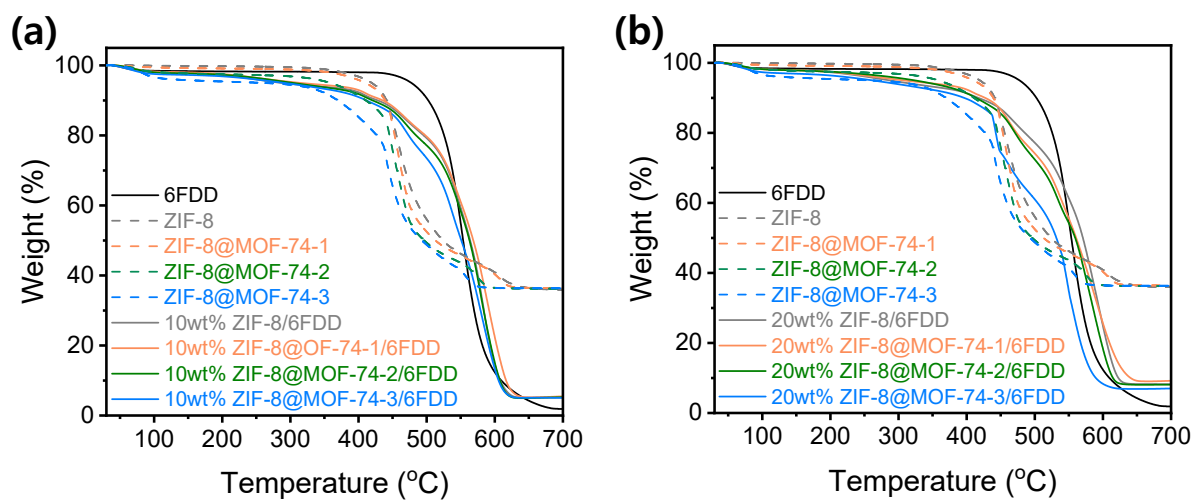

**Fig. S11.** TGA curves for (a) ZIF-8 and ZIF-8@1-3 nanoparticles, pure 6FDD, and the 10 wt% ZIF-8/6FDD and series of 10 wt% ZIF-8@MOF-74/6FDD MMMs and (b) ZIF-8 and ZIF-8@MOF-74 nanoparticles, pure 6FDD, and the 20 wt% ZIF-8/6FDD and series of 10 wt% ZIF-8@MOF-74/6FDD MMMs measured under an air atmosphere.

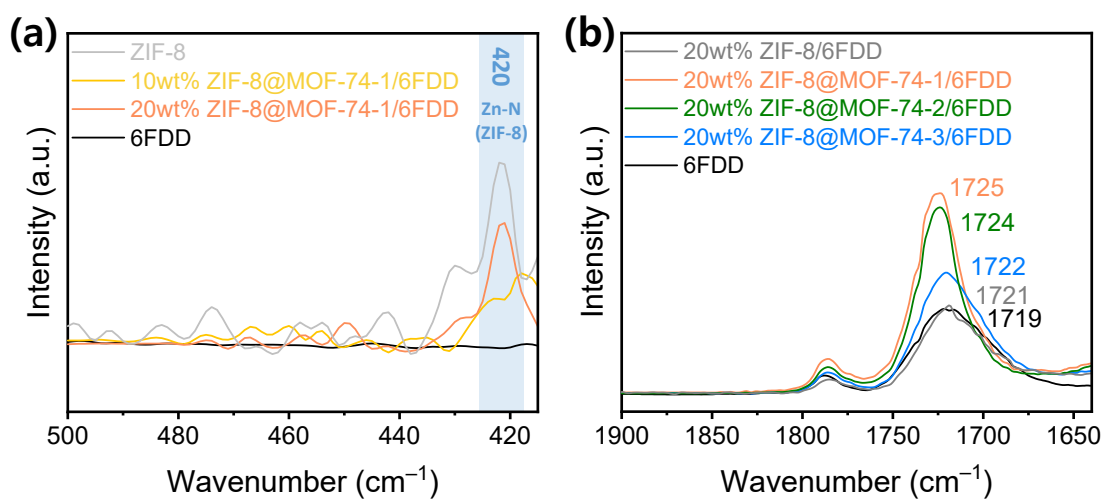

**Fig. S12.** FT-IR spectra for (a) ZIF-8 nanoparticle, 6FDD and the 10 and 20 wt% ZIF-8@MOF-74-1/6FDD MMMs and (b) 6FDD membrane, 20wt% ZIF-8/6FDD and series of 20 wt% ZIF-8@MOF-74-3/6FDD MMMs in the wavenumber ranges from 500-415  $\text{cm}^{-1}$  and 1900-1640  $\text{cm}^{-1}$ , respectively.

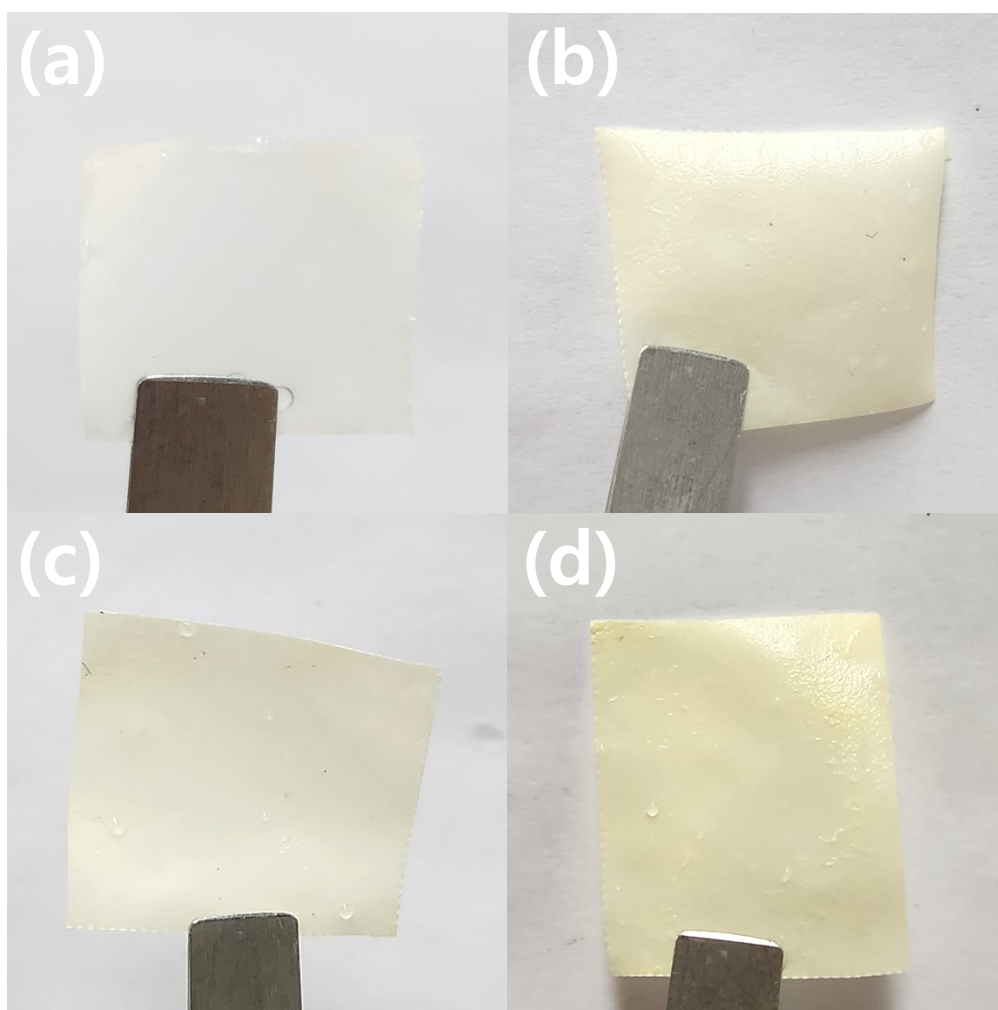

**Fig. S13.** Optical images of the (a) 20 wt% ZIF-8/6FDD, (b) 20 wt% ZIF-8@MOF-74-1/6FDD, (c) 20 wt% ZIF-8@MOF-74-2/6FDD, and (d) 20 wt% ZIF-8@MOF-74-3/6FDD MMMs.

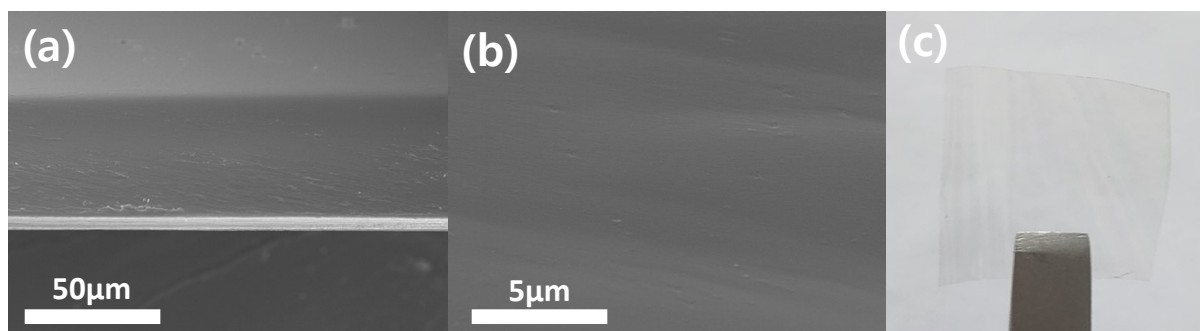

**Fig. S14.** Cross-sectional SEM images at (a) low and (b) high resolution and (c) an optical image of the 6FDD polyimide membrane.

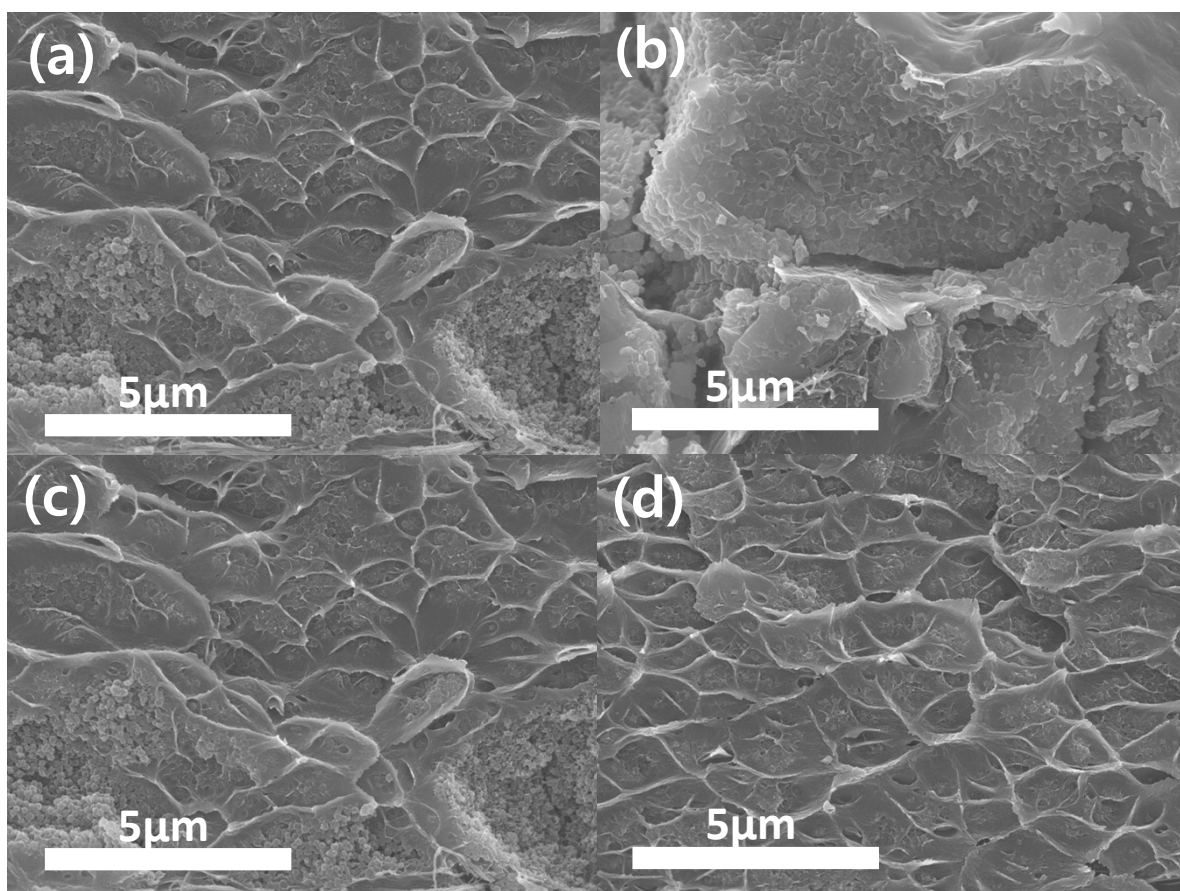

**Fig. S15.** Cross-sectional SEM images of the bottom surfaces of the (a) 20 wt% ZIF-8/6FDD, (b) 20 wt% ZIF-8@MOF-74-1/6FDD, (c) 20 wt% ZIF-8@MOF-74-2/6FDD, and (d) 20 wt% ZIF-8@MOF-74-3/6FDD MMMs.

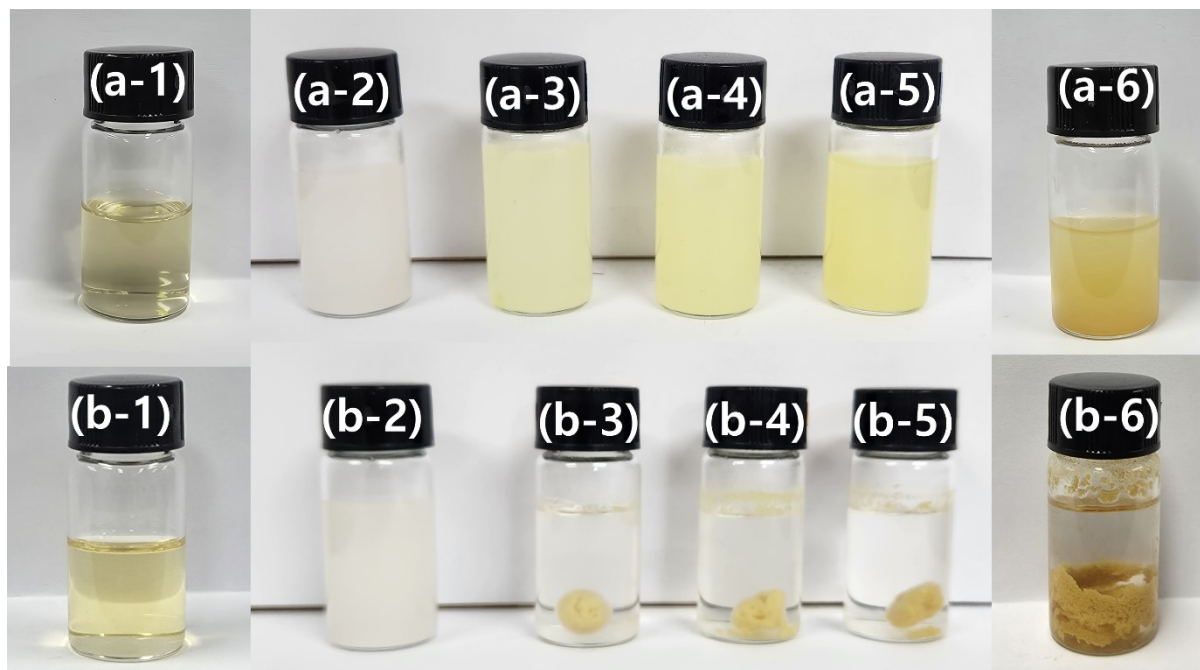

**Fig. S16.** Compatibility test of the ZIF-8 and ZIF-8@MOF-74 powders in 6FDD polymer solution (a) immediately after addition and (b) after stirring overnight. 1 = DHTA ligand, 2 = ZIF-8, 3 = ZIF-8@MOF-74-1, 4 = ZIF-8@MOF-74-2, 5 = ZIF-8@MOF-74-3 and 6 = Zn-MOF-74.

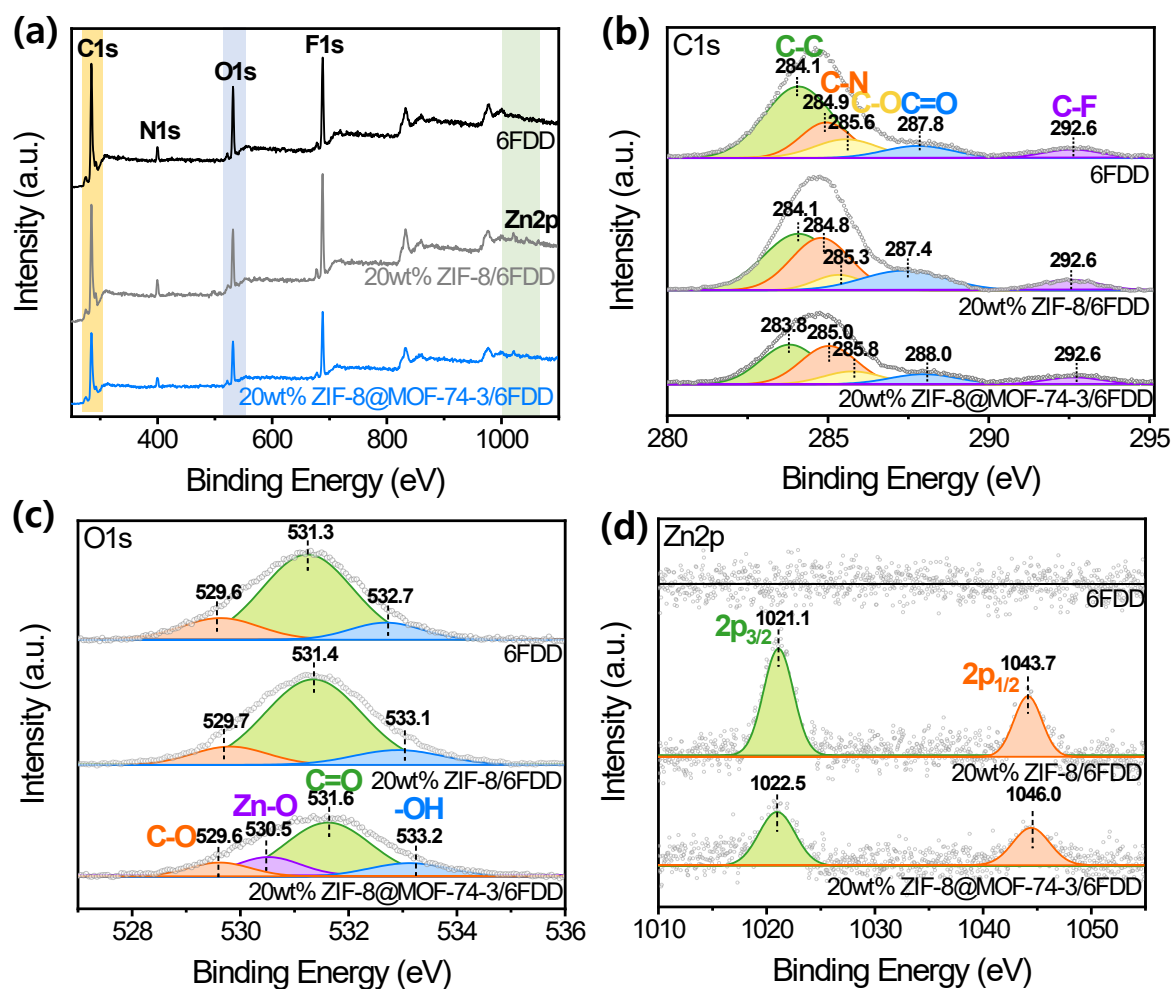

**Fig S17.** a) Survey XPS spectra and high-resolution XPS spectra for the b) C 1s, c) O 1s, and d) Zn 2p of pristine 6FDD, 20 wt% ZIF-8/6FDD, and 20 wt% ZIF-8@MOF-74-3/6FDD MMMs with deconvolution of the major peak.

XPS analysis was performed for pristine 6FDD, 20 wt% ZIF-8/6FDD, and 20 wt% ZIF-8@MOF-74-3/6FDD MMM to investigate the interfacial interactions between the carboxylic acid groups of 6FDD and the Zn-MOF-74 moieties, particularly the open metal sites (OMS) and hydroxyl functionalities. The survey spectra and high-resolution C 1s, O 1s, and Zn 2p spectra are shown in **Fig. S17**. As shown in the C 1s spectrum of pristine 6FDD was deconvoluted into five components corresponding to C-C, [7,8] C-N, [8,9] C-O, [7-9] C=O [7-9] and C-F [7] bonds at 284.1, 284.9, 285.6, 287.8, and 292.6 eV for pristine 6FDD membrane

(**Fig. S17b**). The O 1s spectra was deconvoluted to C-O, [9,10] C=O [9,10] and -OH [10] for the pristine 6FDD membrane with 529.6, 531.3, and 532.7 eV. For the 20 wt% ZIF-8@MOF-74-3/6FDD MMM, an additional O 1s component appeared at 530.5 eV, which can be assigned to the Zn-O bond associated with the DHTA ligand of Zn-MOF-74 (**Fig. S17c**). [11] In the Zn 2p spectra, no Zn signal was observed for pristine 6FDD, whereas both MMMs exhibited characteristic 2p 3/2 and 2p 1/2 (**Fig. S17d**). [11,12] Notably, the binding energy of C 1s and O 1s moved higher for the 20 wt% ZIF-8@MOF-74-3/6FDD MMM compared to pristine 6FDD and 20 wt% ZIF-8/6FDD MMM. These shifts indicate changes in the local electronic environment, suggesting interactions between the polymer functional groups and the MOF surface. [13–15] In particular, an increase in binding energy in the Zn 2p peaks implies that Zn electron density decreased due to the coordination with the carboxylic acid polymer matrix. [16]

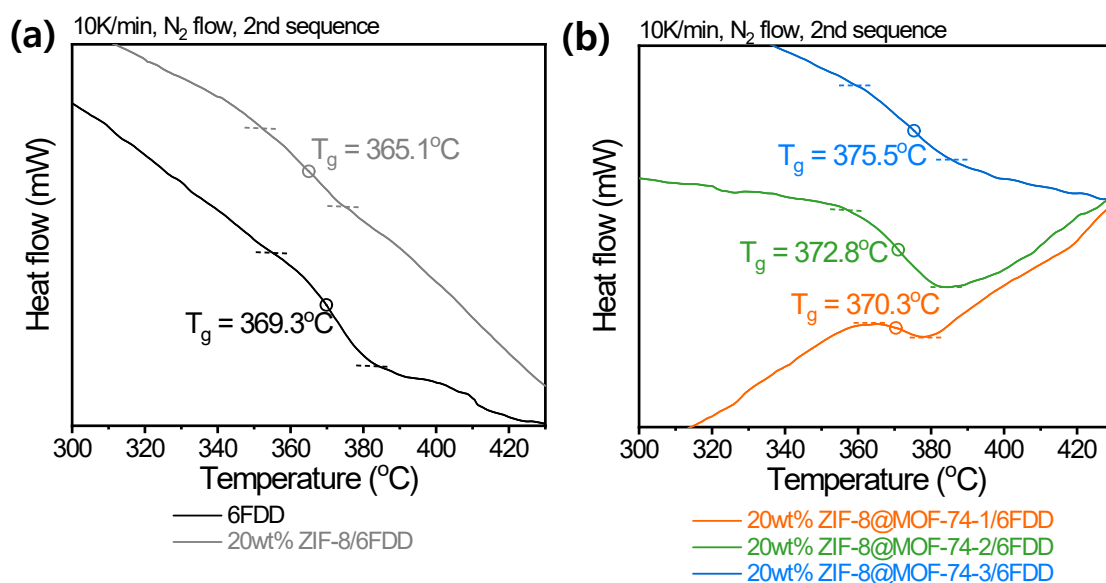

**Fig. S18.** DSC curves of (a) pristine 6FDD and 20wt% ZIF-8/6FDD MMM and (b) series of 20 wt% ZIF-8@MOF-74 MMMs under nitrogen atmosphere with 2<sup>nd</sup> sequence.

DSC analysis (**Fig. S18**) shows the  $T_g$  of the 20 wt% ZIF-8@MOF-74/6FDD MMMs increases compared to pristine 6FDD and the 20 wt% ZIF-8/6FDD MMM. Notably, the 20 wt% ZIF-8/6FDD MMM exhibits a slightly decreased  $T_g$  relative to pristine 6FDD, which can be attributed to poor interfacial compatibility between ZIF-8 and the polymer matrix. This weak interaction likely induces localized polymer chain relaxation near the filler surface, leading to enhanced segmental mobility [17].

In contrast, the elevated  $T_g$  observed for the series of 20 wt% ZIF-8@MOF-74/6FDD MMMs indicates restricted polymer chain mobility, suggesting stronger interfacial interactions between the MOF surface and the polymer matrix. Furthermore, the progressive increase in  $T_g$  with increasing Zn-MOF-74 content within the ZIF-8@MOF-74 structure supports enhanced interfacial confinement effects.

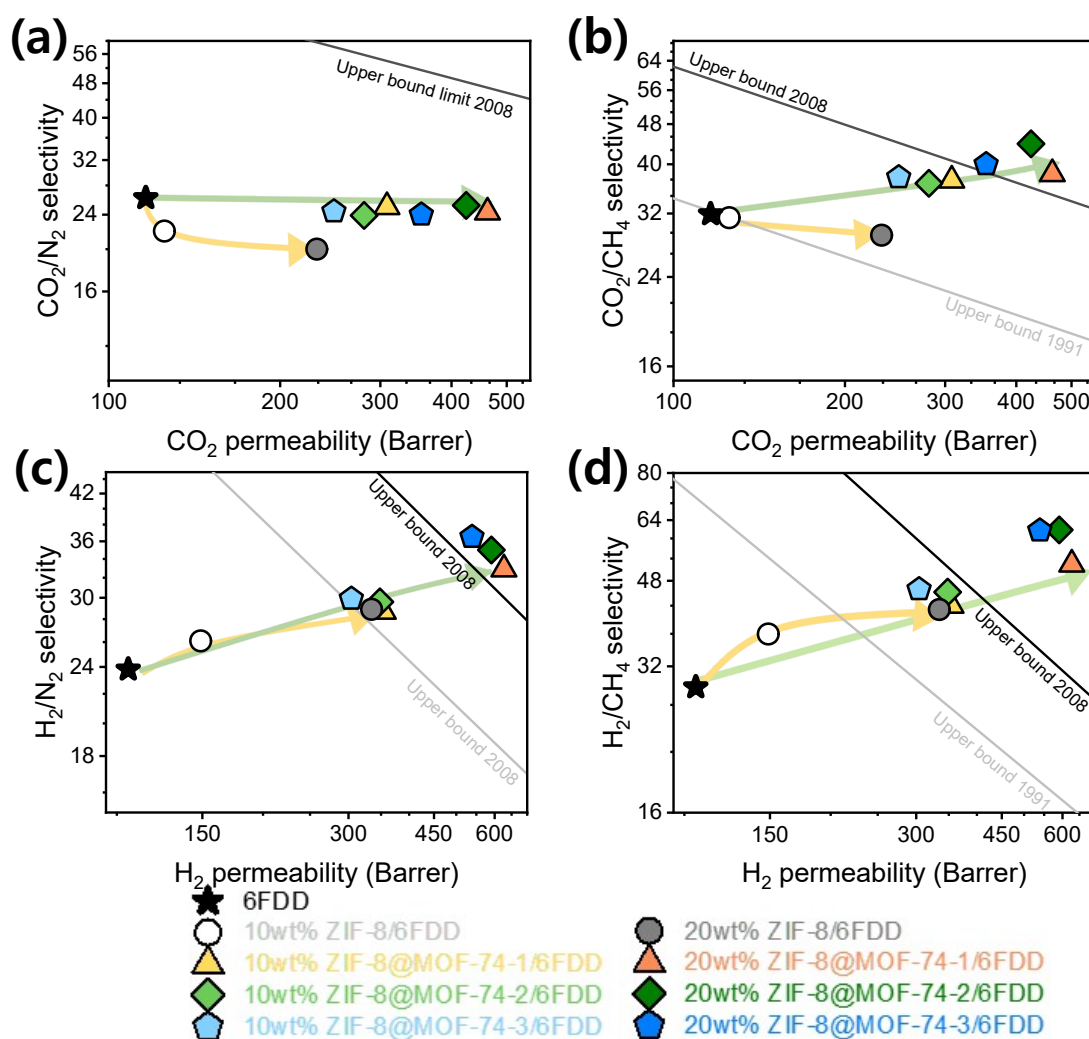

**Fig. S19.** a)  $\text{CO}_2/\text{N}_2$ , b)  $\text{CO}_2/\text{CH}_4$ , c)  $\text{H}_2/\text{N}_2$ , and d)  $\text{H}_2/\text{CH}_4$  gas separation performances of pure 6FDD polyimide membrane, ZIF-8/6FDD MMM, and series of ZIF-8@MOF-74/6FDD MMMs with 10 or 20 wt% MOF loading at 15 psi and 35 °C with the upper-bound limits

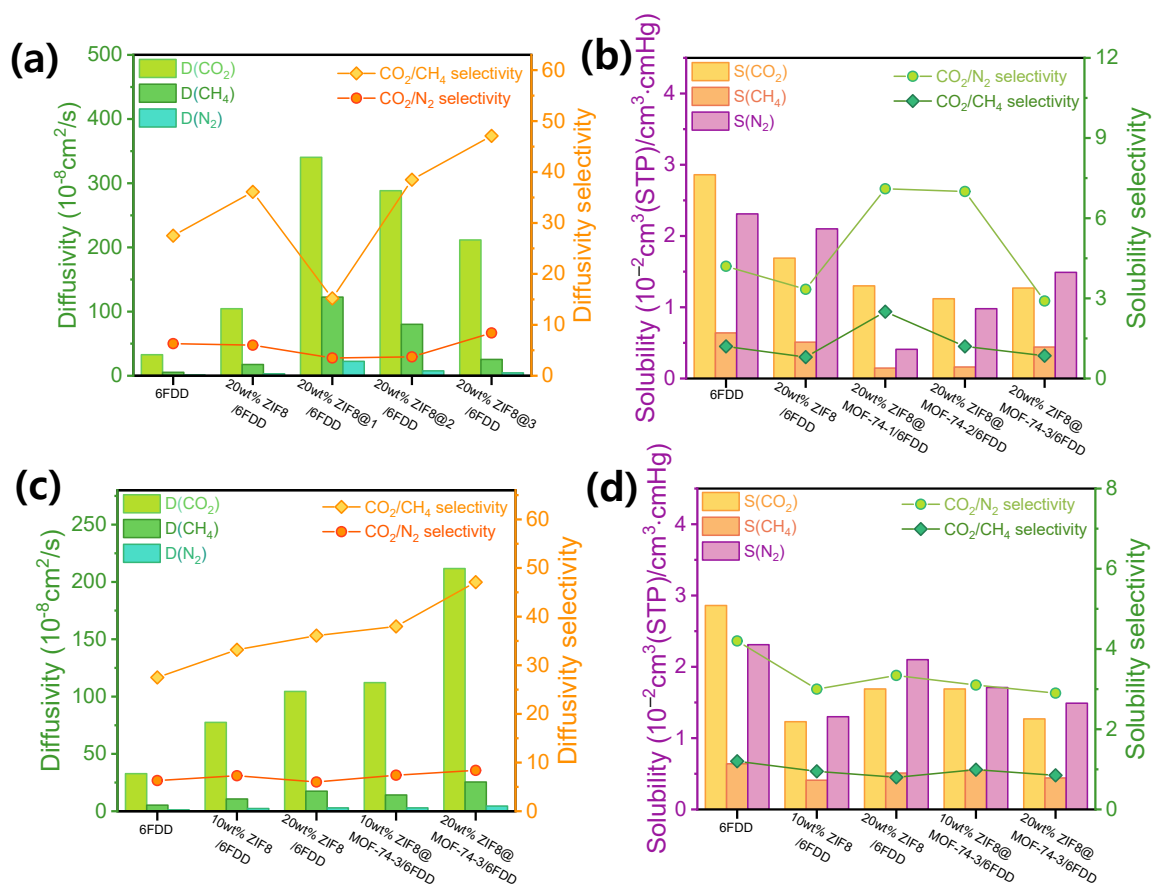

**Fig. S20.** (a, c)  $\text{N}_2$ ,  $\text{CH}_4$ ,  $\text{CO}_2$  diffusivities and  $\text{CO}_2/\text{N}_2$  and  $\text{CO}_2/\text{CH}_4$  diffusivity-selectivity values and (b, d)  $\text{N}_2$ ,  $\text{CH}_4$ , and  $\text{CO}_2$  solubilities, and  $\text{CO}_2/\text{N}_2$  and  $\text{CO}_2/\text{CH}_4$  solubility-selectivity values, for the (a, b) 6FDD polyimide membrane, 20 wt% ZIF-8/6FDD and series of 20 wt% ZIF-8@MOF-74/6FDD MMMs and (c, d) 6FDD polyimide membrane, 10 and 20 wt% ZIF-8/6FDD and ZIF-8@MOF-74-3/6FDD MMMs. Measurements were conducted at 15 psi and  $35^\circ\text{C}$

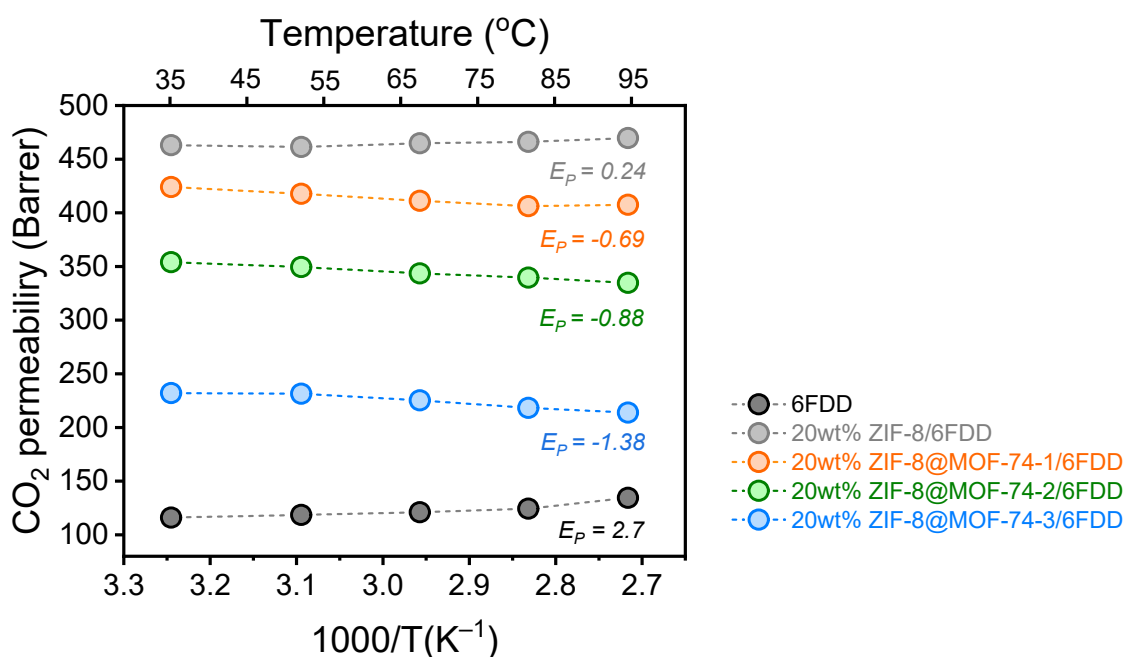

**Fig. S21.** Arrhenius plots of CO<sub>2</sub> permeability for pristine 6FDD, 20 wt% ZIF-8/6FDD, and series of 20 wt% ZIF-8@MOF-74/6FDD MMMs measured at 15 psi with different temperatures (35-95 °C). The apparent activation energies for CO<sub>2</sub> permeability ( $E_p$ ) were determined from the slopes of the linear fits according to the Arrhenius equation.

The apparent activation energies for CO<sub>2</sub> permeability ( $E_p$ ) were determined from the temperature dependence of permeability using the Arrhenius equation (S8) for pristine 6FDD, 20 wt% ZIF-8/6FDD, and series of 20 wt% ZIF-8@MOF-74/6FDD MMMs.

$$\ln k = -(E_p/R)(1/T) \ln A \quad (\text{S8})$$

where,  $k$  is the rate constant,  $A$  is the pre-exponential factor,  $R$  is the gas constant with 8.134 J/K·mol,  $T$  is the temperature in K (Kelvin), and  $E_p$  is the activation energy for the CO<sub>2</sub> permeability.

The temperature dependence of CO<sub>2</sub> permeability (35-95 °C) provides important insight into the governing transport mechanisms (Fig. S21). Pristine 6FDD exhibits a positive apparent

activation energy ( $E_p = +2.7$  kJ/mol). Incorporation of ZIF-8 reduces the activation energy to  $E_p = +0.24$  kJ/mol, indicating a lowered effective diffusion barrier. This decrease is attributed to the introduction of intrinsic microporous transport pathways within ZIF-8 and locally increased free volume at relatively weak polymer-filler interfaces. Moreover, as temperature increases, polymer chains undergo enhanced segmental relaxation, increasing free-volume fluctuations and facilitating gas diffusion. [18]

Surprisingly, ZIF-8@MOF-74-3/6FDD MMM exhibit a further decrease in activation energy ( $E_p = -1.38$  k/mol). In conventional glassy membranes, increasing temperature promotes polymer chain relaxation and typically increases permeability. This phenomenon is due to the increase of sorption sites (OMSs) and strong interfacial adhesion between the Zn-MOF-74 and the polyimide matrix (supported by **Fig. S15-18**), evidence of coordination and hydrogen bonding, which restricts temperature-induced chain relaxation. [19–21] Such interfacial confinement restricts temperature-induced polymer chain relaxation and reduces the temperature sensitivity of diffusion. This phenomenon is noteworthy, as negative apparent activation energies for CO<sub>2</sub> permeability are relatively uncommon in membrane systems. [21,22]

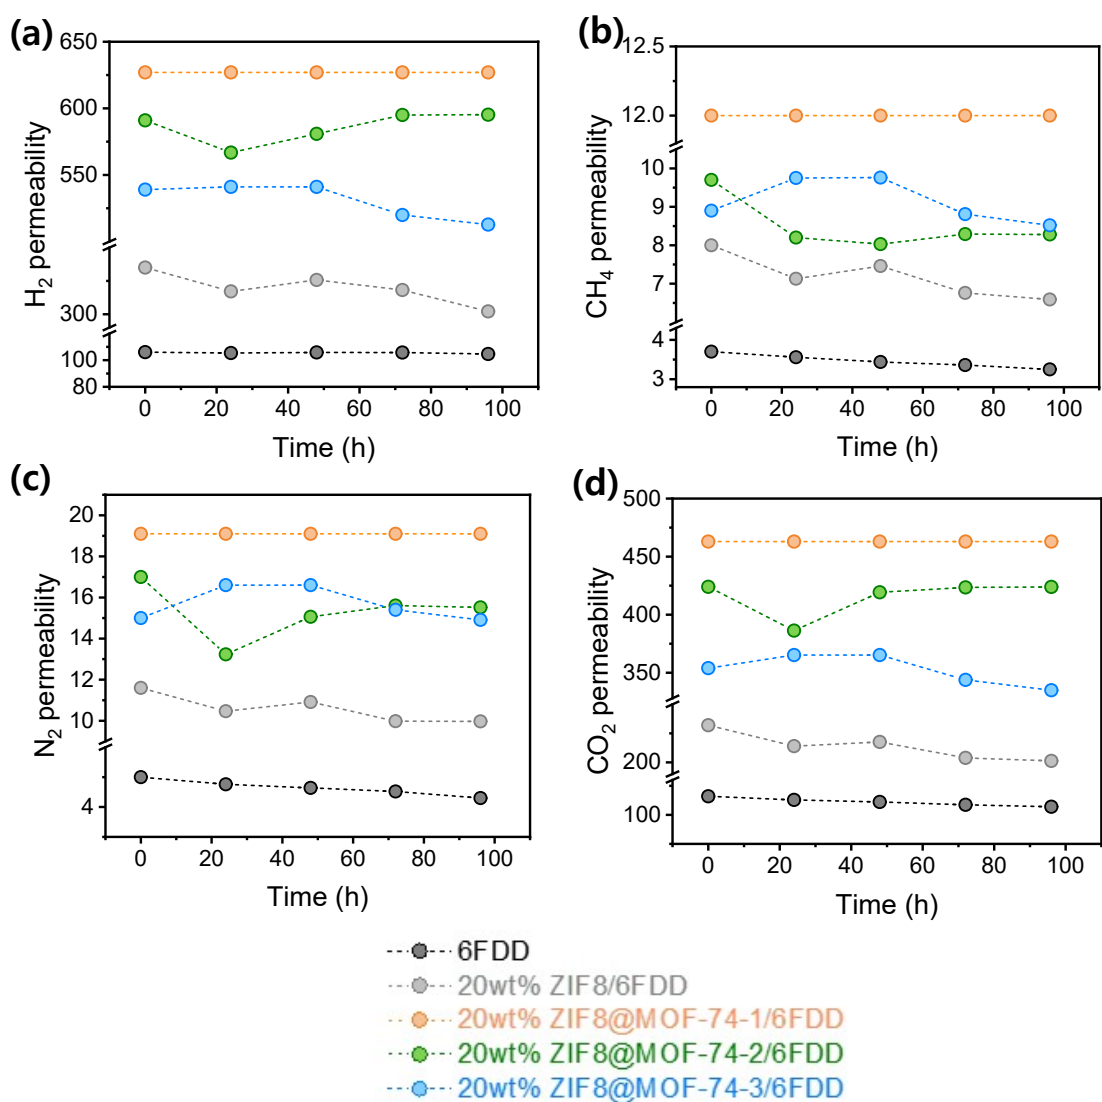

**Fig. S22.** Long-term gas permeability of pristine 6FDD, 20 wt% ZIF-8/6FDD, and series of 20 wt% ZIF-8@MOF-74/6FDD MMMs for 96 hours at 15 psi and 35 °C.

### Maxwell model Calculations

The Maxwell model was used to estimate the theoretical gas permeability limits of the MMMs based on the properties of the polymer matrix and the dispersed filler phase as follows:

$$P_{eff} = P_c \left[ \frac{P_d + 2P_c - 2\Phi_d(P_c - P_d)}{P_d + 2P_c + \Phi_d(P_c - P_d)} \right], \quad (\text{S9})$$

where  $P_{eff}$  is the effective permeability of the MMM, and  $P_c$  and  $P_d$  are the permeabilities of the continuous (polymer) and dispersed (MOF) phases, respectively.

The volume fraction ( $\Phi_d$ ) of the MOFs was calculated as follows:

$$\Phi_d = \frac{w_d/\rho_d}{w_d/\rho_d + w_c/\rho_c}, \quad (\text{S10})$$

where  $w_d$  and  $w_c$  are the weights and  $\rho_d$  and  $\rho_c$  are the densities of the dispersed and continuous phases, respectively. The reported  $\rho_d$  values for 6FDD and ZIF-8 are 1.30 and 0.95 g/cm<sup>3</sup>, respectively [23].

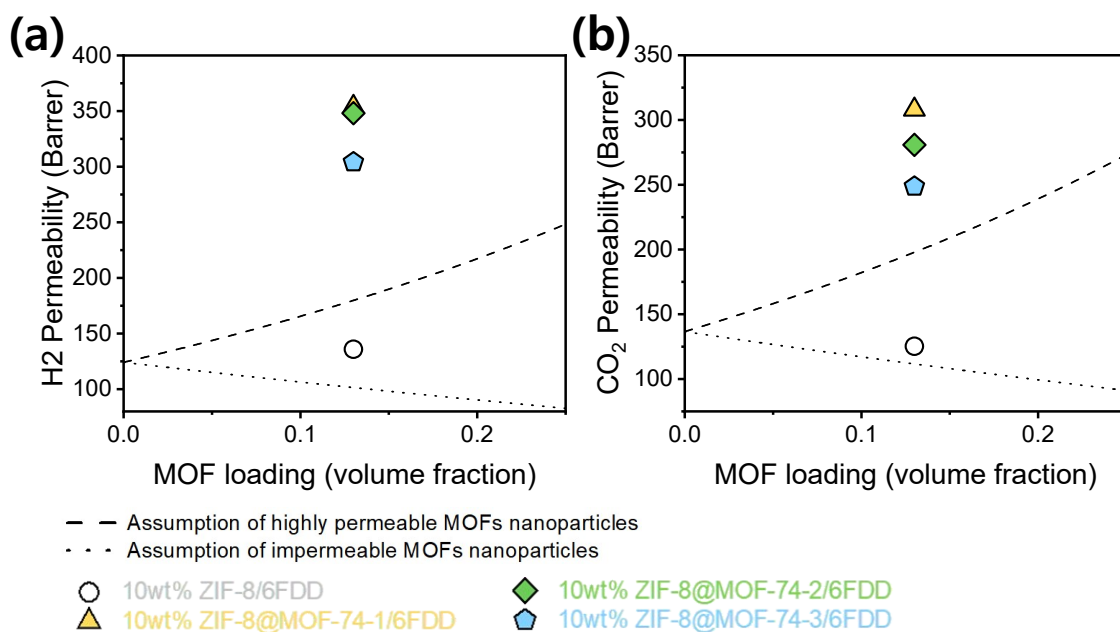

**Fig. S23.** H<sub>2</sub> and CO<sub>2</sub> permeabilities as a function of MOF volumetric loading for the 10 wt% 6FDD/ZIF-8 and series of 6FDD/ZIF-8@MOF-74 MMMs at 15 psi and 35 °C. The permeabilities of the MMMs are compared with the theoretical values estimated using the Maxwell model in terms of the respective upper ( $P_d=\infty$ ) and lower ( $P_d=0$ ) permeability limits.

The Maxwell model is based on several simplifying assumptions: (i) filler particles are approximately spherical and uniformly dispersed at low volume fractions; (ii) the polymer and filler phases are homogeneous and non-porous, each characterized by a single, spatially uniform transport coefficient; and (iii) polymer–filler interfaces are ideal, such that they do not introduce additional transport resistances or pathways and the filler particles remain effectively isolated and non-interacting. Under these conditions, the model provides a reliable prediction of the effective permeability of mixed-matrix membranes (MMMs). Deviations observed at higher filler loadings or in more complex systems are commonly attributed to effects such as filler connectivity, interfacial void formation, particle anisotropy, and non-uniform particle size distributions. To partially address these limitations, modified effective-medium models have been proposed, for example, by incorporating shape factors for non-spherical inclusions or

correction terms for non-ideal interfaces; however, these models generally retain the central assumption of non-porous, non-hierarchical filler phases.

In this work, the Maxwell model is employed as a theoretical baseline to relate the intrinsic transport properties of the polymer matrix and the MOF filler to the overall membrane performance, and to assess the extent to which the experimental permeation data deviates from the behavior expected for ideal, dilute composites. Unlike the Maxwell framework's assumptions of non-interacting, spherical, impermeable inclusions, the Zn-MOF-74 decorated ZIF-8 filler in our system exhibits two key deviations: i) enhanced polymer-MOF interfacial interactions that facilitate non-classical transport pathways beyond conventional MMMs, and ii) interconnected MOF violate the isolated, spherical inclusion geometry. Consequently, the Maxwell model provides a conservative reference for conventional fillers, whereas our hierarchical Zn-MOF-74@ZIF-8 system demonstrates superior performance driven by these interfacial and morphological effects characteristic of advanced MMM architectures

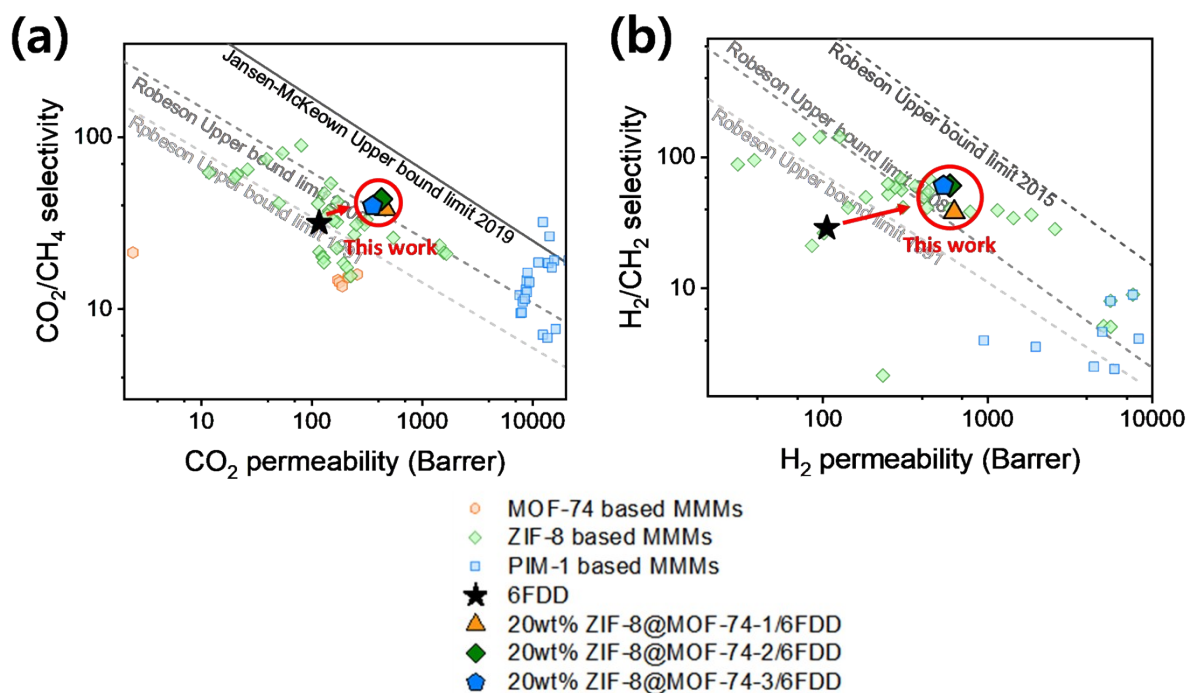

**Fig. S24.** (a)  $\text{CO}_2/\text{CH}_4$  and (b)  $\text{H}_2/\text{CH}_4$  pure gas separation performances at 15 psi and 35 °C with Robeson upper bound permeability limits of 1991, 2008, 2015, and Jansen-McKown upper bound limit 2019 for the pristine 6FDD membrane and series of 20 wt% ZIF8@MOF-74/6FDD MMMs compared to previously reported ZIF-8 and MOF-74-based MMMs. The gray symbols indicate the data obtained from the previously reported literature. [21,24-38]

**Table S1.** Actual MOF weight loadings in MMMs determined by back-calculation based on

| <b>Sample</b>                     | <b>Actual Weight (%)</b> | <b>Sample</b>                     | <b>Actual Weight (%)</b> |
|-----------------------------------|--------------------------|-----------------------------------|--------------------------|
| <b>6FDD</b>                       | 0                        | <b>6FDD</b>                       | 0                        |
| <b>10 wt% ZIF-8/6FDD</b>          | 13 ± 2.4                 | <b>20 wt% ZIF-8/6FDD</b>          | 24 ± 0.7                 |
| <b>10 wt% ZIF-8@MOF-74-1/6FDD</b> | 14 ± 2.4                 | <b>20 wt% ZIF-8@MOF-74-1/6FDD</b> | 23 ± 2.3                 |
| <b>10 wt% ZIF-8@MOF-74-2/6FDD</b> | 13 ± 3.1                 | <b>20 wt% ZIF-8@MOF-74-2/6FDD</b> | 22 ± 1.7                 |
| <b>10 wt% ZIF-8@MOF-74-3/6FDD</b> | 13 ± 3.5                 | <b>20 wt% ZIF-8@MOF-74-3/6FDD</b> | 22 ± 2.6                 |

TGA results.

**Table S2.** Mechanical properties of the pure 6FDD polyimide membrane and the 10 wt% ZIF-

| <b>Sample</b>                     | <b>Yield Strength (MPa)</b> | <b>Young's Modulus (MPa)</b> | <b>Elongational at Break (%)</b> | <b>Tensile Strength (MPa)</b> |
|-----------------------------------|-----------------------------|------------------------------|----------------------------------|-------------------------------|
| <b>6FDD</b>                       | 42.1                        | 12.6                         | 7.5                              | 53.6                          |
| <b>10 wt% ZIF-8/6FDD</b>          | 19.2                        | 11.5                         | 1.8                              | 20.6                          |
| <b>10 wt% ZIF-8@MOF-74-3/6FDD</b> | 29.1                        | 12.6                         | 2.8                              | 30.7                          |

8/6FDD and ZIF-8@MOF-74-3/6FDD MMMs.

**Table S3.** N<sub>2</sub>, CH<sub>4</sub>, and CO<sub>2</sub> diffusivities, and CO<sub>2</sub>/N<sub>2</sub> and CO<sub>2</sub>/CH<sub>4</sub> diffusivity-selectivity values for the 6FDD polyimide membrane, 20 wt% ZIF-8/6FDD and series of 20wt% ZIF-8@MOF-74/6FDD MMMs with 10 or 20 wt% MOF loading at 15 psi and 35 °C.

| Sample                                     | $D(\text{N}_2)$ | $D(\text{CH}_4)$ | $D(\text{CO}_2)$ | $D(\text{CO}_2) / D(\text{N}_2)$ | $D(\text{CO}_2) / D(\text{CH}_4)$ |
|--------------------------------------------|-----------------|------------------|------------------|----------------------------------|-----------------------------------|
| <b>6FDD</b>                                | 5.3<br>± 0.5    | 1.2<br>± 0.2     | 32.5<br>± 2.5    | 6.2<br>± 0.1                     | 27.1<br>± 0.2                     |
| <b>10 wt% ZIF-8/<br/>6FDD MMM</b>          | 10.5<br>± 0.5   | 24.<br>± 0.2     | 78.5<br>± 4.5    | 7.5<br>± 0.1                     | 33.4<br>± 0.2                     |
| <b>10 wt% ZIF-8@MOF-<br/>74-1/6FDD MMM</b> | 19.5<br>± 1.5   | 3.9<br>± 0.3     | 142<br>± 10      | 7.3<br>± 0.1                     | 36.8<br>± 0.1                     |
| <b>10 wt% ZIF-8@MOF-<br/>74-2/6FDD MMM</b> | 18.5<br>± 0.8   | 3.7<br>± 0.2     | 138<br>± 5       | 7.5<br>± 0.1                     | 37.8<br>± 0.2                     |
| <b>10 wt% ZIF-8@MOF-<br/>74-3/6FDD MMM</b> | 14.5<br>± 0.5   | 2.9<br>± 0.1     | 112<br>± 4       | 7.72<br>± 0.01                   | 38.0<br>± 0.1                     |
| <b>20 wt% ZIF-8/<br/>6FDD MMM</b>          | 17.5<br>± 0.5   | 2.9<br>± 0.1     | 105<br>± 6       | 6.0<br>± 0.1                     | 36.0<br>± 0.7                     |
| <b>20 wt% ZIF-8@MOF-<br/>74-1/6FDD MMM</b> | 99.5<br>± 6.5   | 22.5<br>± 1.5    | 340<br>± 22      | 3.42<br>± 0.01                   | 15.1<br>± 0.1                     |
| <b>20 wt% ZIF-8@MOF-<br/>74-2/6FDD MMM</b> | 80.5<br>± 6.5   | 7.6<br>± 0.6     | 289<br>± 24      | 3.59<br>± 0.01                   | 38.0<br>± 0.1                     |
| <b>20 wt% ZIF-8@MOF-<br/>74-3/6FDD MMM</b> | 25.5<br>± 1.5   | 4.5<br>± 0.2     | 212<br>± 11      | 8.30<br>± 0.08                   | 47.0<br>± 0.2                     |

The diffusivity ( $D$ ) values are reported as  $10^{-8}$  cm<sup>2</sup>/s.

**Table S4.** N<sub>2</sub>, CH<sub>4</sub>, and CO<sub>2</sub> solubilities, and CO<sub>2</sub>/N<sub>2</sub> and CO<sub>2</sub>/CH<sub>4</sub> solubility-selectivity values for the 6FDD polyimide membrane, 20 wt% ZIF-8/6FDD and series of 20 wt% ZIF-8@MOF-74/6FDD MMMs with 10 or 20 wt% MOF loading at 15 psi and 35 °C.

| Sample                                     | <i>S</i> (N <sub>2</sub> ) | <i>S</i> (CH <sub>4</sub> ) | <i>S</i> (CO <sub>2</sub> ) | <i>S</i> (CO <sub>2</sub> ) / <i>S</i> (N <sub>2</sub> ) | <i>S</i> (CO <sub>2</sub> ) / <i>S</i> (CH <sub>4</sub> ) |
|--------------------------------------------|----------------------------|-----------------------------|-----------------------------|----------------------------------------------------------|-----------------------------------------------------------|
| <b>6FDD</b>                                | 0.65<br>± 0.01             | 2.3<br>± 0.1                | 2.7<br>± 0.1                | 4.19<br>± 0.03                                           | 1.16<br>± 0.01                                            |
| <b>10 wt% ZIF-8/<br/>6FDD MMM</b>          | 0.400<br>± 0.003           | 1.28<br>± 0.01              | 1.21<br>± 0.01              | 3.03<br>± 0.01                                           | 0.947<br>± 0.003                                          |
| <b>10 wt% ZIF-8@MOF-<br/>74-1/6FDD MMM</b> | 0.454<br>± 0.004           | 1.65<br>± 0.01              | 1.66<br>± 0.02              | 3.66<br>± 0.01                                           | 1.00<br>± 0.01                                            |
| <b>10 wt% ZIF-8@MOF-<br/>74-2/6FDD MMM</b> | 0.477<br>± 0.05            | 1.61<br>± 0.01              | 1.55<br>± 0.01              | 3.25<br>± 0.01                                           | 0.966<br>± 0.002                                          |
| <b>10 wt% ZIF-8@MOF-<br/>74-3/6FDD MMM</b> | 0.521<br>± 0.03            | 1.71<br>± 0.01              | 1.59<br>± 0.1               | 3.04<br>± 0.2                                            | 0.929<br>± 0.066                                          |
| <b>20wt% ZIF-8/<br/>6FDD MMM</b>           | 0.522<br>± 0.01            | 2.09<br>± 0.02              | 1.69<br>± 0.01              | 3.24<br>± 0.01                                           | 0.808<br>± 0.004                                          |
| <b>20 wt% ZIF-8@MOF-<br/>74-1/6FDD MMM</b> | 0.146<br>± 0.02            | 0.41<br>± 0.01              | 1.03<br>± 0.02              | 7.11<br>± 0.01                                           | 2.56<br>± 0.01                                            |
| <b>20 wt% ZIF-8@MOF-<br/>74-2/6FDD MMM</b> | 0.162<br>± 0.04            | 0.97<br>± 0.03              | 1.12<br>± 0.03              | 6.93<br>± 0.02                                           | 1.149<br>± 0.002                                          |
| <b>20 wt% ZIF-8@MOF-<br/>74-3/6FDD MMM</b> | 0.448<br>± 0.04            | 1.50<br>± 0.01              | 1.27<br>± 0.01              | 2.84<br>± 0.01                                           | 0.849<br>± 0.002                                          |

The solubility (*S*) values are reported as 10<sup>-2</sup> cm<sup>3</sup>(STP)/cm<sup>3</sup>·cmHg.

**Table S5.** CO<sub>2</sub>/N<sub>2</sub> and CO<sub>2</sub>/CH<sub>4</sub> sorption(*S*) selectivity of ZIF-8 and ZIF-8@MOF-74-3 nanoparticles at 308.15K.

| <b>Sample</b>         | <b><math>S(\text{CO}_2)</math><br/>/<math>S(\text{N}_2)</math></b> | <b><math>S(\text{CO}_2)</math><br/>/<math>S(\text{CH}_4)</math></b> |
|-----------------------|--------------------------------------------------------------------|---------------------------------------------------------------------|
| <b>ZIF-8</b>          | 6.4                                                                | 2.6                                                                 |
| <b>ZIF-8@MOF-74-3</b> | 9.7                                                                | 3.0                                                                 |

**Table S6.** Pure- and mixed-gas transport properties of 6FDD and 20 wt% ZIF-8@MOF-74-1/6FDD at 25 °C.

| Sample                         | Pure-gas (2 atm)            |                             |                                  | Mixed-gas<br>(4 atm, equimolar CO <sub>2</sub> /CH <sub>4</sub> ) |                             |                                  |
|--------------------------------|-----------------------------|-----------------------------|----------------------------------|-------------------------------------------------------------------|-----------------------------|----------------------------------|
|                                | CO <sub>2</sub><br>(Barrer) | CH <sub>4</sub><br>(Barrer) | CO <sub>2</sub> /CH <sub>4</sub> | CO <sub>2</sub><br>(Barrer)                                       | CH <sub>4</sub><br>(Barrer) | CO <sub>2</sub> /CH <sub>4</sub> |
| 6FDD                           | 140                         | 4.4                         | 32                               | 160                                                               | 5.5                         | 29                               |
| 20 wt% ZIF-8@MOF-74-1/6FDD MMM | 540                         | 15.2                        | 36                               | 520                                                               | 13.1                        | 40                               |

**Table S7.** Gas separation performance of MOF-74-, ZIF-8-, and PIM-1-based MMMs reported in the literature.

| Sample                             | Test conditions              | Permeability (Barrer) |                     |                     | Selectivity                               |                                          | References |
|------------------------------------|------------------------------|-----------------------|---------------------|---------------------|-------------------------------------------|------------------------------------------|------------|
|                                    |                              | P(H <sub>2</sub> )    | P(CO <sub>2</sub> ) | P(CH <sub>4</sub> ) | P(CO <sub>2</sub> ) / P(CH <sub>4</sub> ) | P(H <sub>2</sub> ) / P(CH <sub>4</sub> ) |            |
| MOF-74 based MMMs                  | 2wt% Pebax/Ni(Zn)-MOF-74-2   |                       | 216.0               | 14.10               | 15.32                                     |                                          |            |
|                                    | 2wt% Pebax/Ni(Zn)-MOF-74-21  | 35 °C                 | 260.3               | 16.43               | 15.84                                     |                                          |            |
|                                    | 2wt% Pebax/Ni(Zn)-MOF-74-11  | Mixed gas (50:50)     | 174.2               | 11.86               | 14.69                                     |                                          | [24]       |
|                                    | 2wt% Pebax/Ni(Zn)-MOF-74-12  |                       | 179.5               | 12.61               | 14.23                                     |                                          |            |
|                                    | 2wt% Pebax/Zn-MOF-74         |                       | 190.3               | 14.10               | 13.50                                     |                                          |            |
|                                    | 5wt% Mg-MOF-74/PVAc          | 35 °C                 | 0.86                | 0.07                | 12.00                                     |                                          |            |
|                                    | 15wt% Mg-MOF-74/PVAc         | 11 bar                | 1.72                | 0.11                | 15.60                                     |                                          | [25]       |
|                                    | 20wt% Mg-MOF-74/PVAc         | Single gas            | 2.42                | 0.11                | 21.20                                     |                                          |            |
|                                    | 2wt% ZIF-8/Pebax             |                       | 117.9               | 5.50                | 21.40                                     |                                          |            |
|                                    | 3wt% ZIF-8/Pebax             | Single gas            | 125.7               | 6.30                | 20.00                                     |                                          | [26]       |
| 4wt% ZIF-8/Pebax                   | 128.4                        |                       | 6.50                | 19.80               |                                           |                                          |            |
| 5wt% ZIF-8/Pebax                   | 130.0                        |                       | 7.0                 | 18.60               |                                           |                                          |            |
| ZIF-8 based MMMs                   | 10wt% ZIF-8/ODPA-TMPDA       |                       | 144.0               | 3.89                | 37.00                                     |                                          |            |
|                                    | 20wt% ZIF-8/ODPA-TMPDA       | 25 °C                 | 246.0               | 9.11                | 27.00                                     |                                          |            |
|                                    | 30wt% ZIF-8/ODPA-TMPDA       |                       | 316.0               | 9.58                | 33.00                                     |                                          |            |
|                                    | 10wt% ZIF-8/ODPA-TMPDA       | Single gas            | 131.0               | 2.79                | 47.00                                     |                                          | [27]       |
|                                    | 20wt% ZIF-8/ODPA-TMPDA       |                       | 172.0               | 4.10                | 42.00                                     |                                          |            |
|                                    | 30wt% ZIF-8/ODPA-TMPDA       |                       | 115.0               | 2.80                | 41.00                                     |                                          |            |
|                                    | 16.7wt% ZIF-8@CA             | 25 °C                 | 170.2               | 7.6                 | 22.50                                     |                                          |            |
|                                    | 16.7wt% PEI-grafted ZIF-8@CA | 0.3 Mpa               | 150.3               | 2.80                | 53.7                                      |                                          | [28]       |
|                                    |                              | Single gas            |                     |                     |                                           |                                          |            |
|                                    | 30wt% ZIF-8@PDA/TB           | 35 °C                 | 478.6               | 196.2               | 10.66                                     | 18.40                                    | 44.9       |
| 40wt% ZIF-8@PDA/TB                 | 4.5 bar                      | 542.25                | 209.6               | 12.05               | 17.40                                     | 45.0                                     | [29]       |
| 50wt% ZIF-8@PDA/TB                 | Single gas                   | 674.45                | 277.3               | 17.89               | 15.50                                     | 37.7                                     |            |
| 10wt% ZIF-8-NH <sub>2</sub> /6FBDA |                              | 30.6                  | 21.2                | 0.35                | 60.60                                     | 87.4                                     |            |
| 20wt% ZIF-8-NH <sub>2</sub> /6FBDA | 6 bar                        | 28.5                  | 26.4                | 0.41                | 64.60                                     | 93.9                                     |            |
| 30wt% ZIF-8-NH <sub>2</sub> /6FBDA |                              | 72.2                  | 39.3                | 0.53                | 74.20                                     | 136.2                                    | [30]       |
| 40wt% ZIF-8-NH <sub>2</sub> /6FBDA | Single gas                   | 96.1                  | 54.7                | 0.68                | 80.40                                     | 141.3                                    |            |
| 50wt% ZIF-8-NH <sub>2</sub> /6FBDA |                              | 127.5                 | 80.8                | 0.9                 | 89.40                                     | 141.7                                    |            |
| 10wt% ZIF-8/6FDD                   | 35 °C                        | 182                   | 139.3               | 4.0                 | 35.10                                     | 45.8                                     | [31]       |

|                         |                                     |            |       |        |      |       |       |      |
|-------------------------|-------------------------------------|------------|-------|--------|------|-------|-------|------|
|                         | 20wt% ZIF-8/6FDD                    | 15 psi     | 254   | 170.7  | 5.3  | 32.40 | 48.2  |      |
|                         | 30wt% ZIF-8/6FDD                    | Single gas | 424   | 303.1  | 9.8  | 30.90 | 43.2  |      |
|                         | 10wt% ZIF-8-NH <sub>2</sub> /6FDD   |            | 185   | 158.7  | 4.9  | 32.70 | 38.2  |      |
|                         | 20wt% ZIF-8-NH <sub>2</sub> /6FDD   |            | 336   | 255.5  | 8.3  | 30.90 | 40.7  |      |
|                         | 30wt% ZIF-8-NH <sub>2</sub> /6FDD   |            | 762   | 552.4  | 21.3 | 25.90 | 35.7  |      |
|                         | 3wt% ZIF-8/6FDA-durene              | 6 bar      |       | 1449.7 | 62.1 | 23.34 |       |      |
|                         | 5wt% ZIF-8/6FDA-durene              | Single gas |       | 1582.8 | 74.7 | 21.19 |       | [32] |
|                         | 7wt% ZIF-8/6FDA-durene              |            |       | 1671.6 | 80.1 | 20.87 |       |      |
|                         | 10wt% ZIF-8/6FDA-BI                 | 35 °C      |       | 11.8   | 0.19 | 62.11 |       |      |
|                         | 20wt% ZIF-8/6FDA-BI                 | 4 bar      |       | 20.3   | 0.35 | 58.00 |       | [33] |
|                         | 30wt% ZIF-8/6FDA-BI                 | Single gas |       | 50.9   | 1.24 | 41.05 |       |      |
|                         | 9wt% MIL-101/PIM-1                  | 25 °C      | 955   | 2830   | 241  | 11.74 | 3.96  |      |
|                         | 17wt% MIL-101/PIM-1                 | 1 bar      | 1970  | 5940   | 556  | 10.68 | 3.54  | [34] |
|                         | 23wt% MIL-101/PIM-1                 | Single gas | 2880  | 8310   | 706  | 11.77 | 4.08  |      |
|                         | 10wt% MOF-808/PIM-1                 | 35 °C      |       | 11370  | 612  | 18.6  |       |      |
|                         | 10wt% MOF-808@Lys                   | 3 bar      |       | 14354  | 543  | 26.4  |       | [21] |
|                         | 10wt% MOF-808@Arg                   | Single gas |       | 14056  | 762  | 18.5  |       |      |
|                         | 10wt% MOF-808@Cst                   |            |       | 13877  | 749  | 18.5  |       |      |
|                         | 2wt% MUF-15@PIM-1                   | 20 °C      | 4450  | 12470  | 1770 | 7.06  | 2.5   |      |
|                         | 5wt% MUF-15@PIM-1                   | 1 bar      | 5000  | 16310  | 2140 | 7.62  | 4.6   | [35] |
|                         | 10wt% MUF-15@PIM-1                  | Single gas | 5920  | 16740  | 2470 | 6.77  | 2.4   |      |
| <b>PIM-1 based MMMs</b> | 20wt% UiO-66-NH <sub>2</sub> /PIM-1 | 25 °C      |       | 7660   | 638  | 12.0  |       |      |
|                         | PIM-co-UiO-66-12h                   | 2 bar      |       | 15815  | 828  | 19.1  |       | [36] |
|                         | PIM-co-UiO-66-72h                   | Single gas |       | 12498  | 392  | 31.9  |       |      |
|                         | 2.5% UiO-66/PIM-1                   |            |       | 7842   | 839  | 9.4   |       |      |
|                         | 5% UiO-66/PIM-1                     |            |       | 8225   | 746  | 11.0  |       |      |
|                         | 7.5% UiO-66/PIM-1                   |            |       | 8753   | 680  | 12.9  |       |      |
|                         | 10% UiO-66/PIM-1                    | 35 °C      |       | 8995   | 723  | 12.5  |       |      |
|                         | 2.5% MOF-808/PIM-1                  | 3 bar      |       | 8053   | 846  | 9.5   |       | [37] |
|                         | 5% MOF-808/PIM-1                    |            |       | 8579   | 755  | 11.4  |       |      |
|                         | 7.5% MOF-808/PIM-1                  |            |       | 8897   | 611  | 14.6  |       |      |
|                         | 10% MOF-808/PIM-1                   |            |       | 9090   | 563  | 16.2  |       |      |
|                         | 10% MOF-74@PIM-1                    | 25 °C      | 5611  | 9400   | 707  | 14.3  | 7.9   |      |
|                         | 15% MOF-74@PIM-1                    | Single gas | 7670  | 15064  | 866  | 17.4  | 8.86  | [38] |
|                         | 20% MOF-74@PIM-1                    |            | 11469 | 21269  | 1114 | 19.1  | 10.29 |      |



## References

- [1] S. Lawson, A. Siemers, J. Kostlenick, Q. Al-Naddaf, K. Newport, A.A. Rownaghi, F. Rezaei, Mixing Mg-MOF-74 with Zn-MOF-74: A Facile Pathway of Controlling the Pharmacokinetic Release Rate of Curcumin, *ACS Appl. Bio Mater.* 4 (2021) 6874-6880.
- [2] O. Karagiari, M.B. Lalonde, W. Bury, A.A. Sarjeant, O.K. Farha, J.T. Hupp, Opening ZIF-8: A Catalytically Active Zeolitic Imidazolate Framework of Sodalite Topology with Unsubstituted Linkers, *J. Am. Chem. Soc.* 134 (2012) 18790-18796.
- [3] G. Liu, Y. Qin, L. Jing, G. Wei, H. Li, Two novel MOF-74 analogs exhibiting unique luminescent selectivity, *Chem. Comm.* 49 (2013) 1699-1701.
- [4] X. Yu, J. Li, M. Du, X. Song, H. Huang, L. Nie, Adaptive lattice-matched MOF and COF core-shell heterostructure for carbon dioxide photoreduction, *Cell Rep. Phys. Sci.* 4 (2023).
- [5] C. Guo, C. Liang, X. Qin, Y. Gu, P. Gao, M. Shao, W.T. Wong, Zeolitic Imidazolate Framework Cores Decorated with Pd Nanoparticles and Coated Further with Metal-Organic Framework Shells (ZIF-8@Pd@MOF-74) as Nanocatalysts for Chemoselective Hydrogenation Reactions, *ACS Appl. Nano Mater.* 3 (2020) 7242-7251.
- [6] F. Frati, M.O.J.Y. Hunault, F.M.F. De Groot, Oxygen K-edge X-ray Absorption Spectra, *Chem. Rev.* 120 (2020) 4056-4110.
- [7] Y. Jiang, L. Chen, C. Xiao, N. Zhou, T. Qing, L. Qian, Friction and Wear Behaviors of Steel Ball Against Polyimide-PTFE Composite Under Rolling-Sliding Motion, *Tribol. Lett.* 69 (2021) 100.
- [8] X. Li, J. Zhang, Y. Han, M. Zhu, S. Shang, W. Li, MOF-derived various morphologies of N-doped carbon composites for acetylene hydrochlorination, *J. Mater. Sci.* 53 (2018) 4913-4926.
- [9] Y. Chen, X. Song, N. Zhang, X. Zhang, G. Su, M. Huang, H. Jiang, Polyethyleneimine-Mediated Polyamide Composite Membrane with High Perm-Selectivity for Forward Osmosis, *Macromol. Mater. Eng.* 306 (2021).
- [10] K. Archana Yadav, G. Mishra, S. Kundu, S. Ghosh, R. Haldar, Spatial functionality gradient in a ZIF-8 thin film membrane, *Chem. Sci.* 16 (2025) 18161-18166.
- [11] Q. Liu, X. Gao, Z. Liu, L. Gai, Y. Yue, H. Ma, Sensitive and Selective Electrochemical Detection of Lead(II) Based on Waste-Biomass-Derived Carbon Quantum Dots@Zeolitic Imidazolate Framework-8, *Materials* 16 (2023).
- [12] J. Peng, Z. Zhang, C. Hu, Z. Wang, Y. Kang, W. Chen, T. Ao, Hierarchically porous ZIF-8 for tetracycline hydrochloride elimination, *J. Solgel Sci. Technol.* 99 (2021) 339-353.
- [13] S. Gadipelli, Z. Guo, Postsynthesis annealing of MOF-5 remarkably enhances the framework structural stability and CO<sub>2</sub> uptake, *Chem. Mat.* 26 (2014) 6333-6338.
- [14] P. Karthik, R. Vinoth, P. Zhang, W. Choi, E. Balaraman, B. Neppolian,  $\pi$ - $\pi$  Interaction between Metal-Organic Framework and Reduced Graphene Oxide for Visible-Light Photocatalytic H<sub>2</sub> Production, *ACS Appl. Energy Mater.* 1 (2018) 1913-1923.
- [15] L.K. Njaramba, Y. Yoon, C.M. Park, Fabrication of porous beta-cyclodextrin functionalized PVDF/Fe-MOF mixed matrix membrane for enhanced ciprofloxacin removal, *NPJ Clean Water* 7 (2024).

- [16] M.W. Gaultois, A.P. Grosvenor, Coordination-induced shifts of absorption and binding energies in the SrFe<sub>1-x</sub>Zn<sub>x</sub>O<sub>3-δ</sub> system, *J. Phy. Chem. C* 114 (2010) 19822-19829.
- [17] J. Dechnik, C.J. Sumby, C. Janiak, Enhancing Mixed-Matrix Membrane Performance with Metal-Organic Framework Additives, *Cryst. Growth Des.* 17 (2017) 4467-4488.
- [18] H. Rabiee, S. Meshkat Alsadat, M. Soltanieh, S.A. Mousavi, A. Ghadimi, Gas permeation and sorption properties of poly(amide-12-b-ethyleneoxide)(Pebax1074)/SAPO-34 mixed matrix membrane for CO<sub>2</sub>/CH<sub>4</sub> and CO<sub>2</sub>/N<sub>2</sub> separation, *J. Ind. Eng. Chem.* 27 (2015) 223-239.
- [19] H.M. Khalid, A. Mujahid, A. Ali, A.L. Khan, M. Saleem, R.M. Santos, Development of Mixed Matrix Membranes by Using NH<sub>2</sub>-Functionalized UiO-66 and [APTMS][AC] Ionic Liquid for the Separation of CO<sub>2</sub>, *Int. J. Energy Res.* 2024 (2024).
- [20] M.Z. Ahmad, T.A. Peters, N.M. Konnertz, T. Visser, C. Téllez, J. Coronas, V. Fila, W.M. de Vos, N.E. Benes, High-pressure CO<sub>2</sub>/CH<sub>4</sub> separation of Zr-MOFs based mixed matrix membranes, *Sep. Purif. Technol.* 230 (2020).
- [21] D. Refaat, M. Yahia, H.D. Martínez-Hernández, M. Jimenez-Ruiz, V. Galván, V. Petrenko, R. Fernández de Luis, J. Coronas, Mixed matrix membranes of PIM-1 incorporating MOF-808 functionalized with amino acids for enhanced CO<sub>2</sub>/CH<sub>4</sub> separation, *J. Mater. Chem. A Mater.* 13 (2025) 39254-39270.
- [22] Y. Weng, W. Ji, C. Ye, H. Dong, Z. Gao, J. Li, C. Luo, X. Ma, Simultaneously enhanced CO<sub>2</sub> permeability and CO<sub>2</sub>/N<sub>2</sub> selectivity at sub-ambient temperature from two novel functionalized intrinsic microporous polymers, *J. Membr. Sci.* 644 (2022).
- [23] J.C. Tan, T.D. Bennett, A.K. Cheetham, Chemical structure, network topology, and porosity effects on the mechanical properties of Zeolitic Imidazolate Frameworks, *Proc. Natl. Acad. Sci. U. S. A.* 107 (2010) 9938-9943.
- [24] S. Majumdar, B. Tokay, V. Martin-Gil, J. Campbell, R. Castro-Muñoz, M.Z. Ahmad, V. Fila, Mg-MOF-74/Polyvinyl acetate (PVAc) mixed matrix membranes for CO<sub>2</sub> separation, *Sep. Purif. Technol.* 238 (2020).
- [25] W. Zhu, L. Wang, W. Liang, R. Guo, Z. Li, Bimetallic MOF-74-based mixed matrix membrane for efficient CO<sub>2</sub> separation, *Micropor. Mesopor. Mat.* 379 (2024).
- [26] S. Meshkat, S. Kaliaguine, D. Rodrigue, Comparison between ZIF-67 and ZIF-8 in Pebax® MH-1657 mixed matrix membranes for CO<sub>2</sub> separation, *Sep. Purif. Technol.* 235 (2020).
- [27] S.A.S.C. Samarasinghe, C.Y. Chuah, Y. Yang, T.H. Bae, Tailoring CO<sub>2</sub>/CH<sub>4</sub> separation properties of mixed-matrix membranes via combined use of two- and three-dimensional metal-organic frameworks, *J. Membr. Sci.* 557 (2018) 30-37.
- [28] Z. Hu, H. Zhang, X.F. Zhang, M. Jia, J. Yao, Polyethylenimine grafted ZIF-8@cellulose acetate membrane for enhanced gas separation, *J. Membr. Sci.* 662 (2022).
- [29] X. Wang, L. Wu, N. Li, Y. Fan, Sealing Tröger base/ZIF-8 mixed matrix membranes defects for improved gas separation performance, *J. Membr. Sci.* 636 (2021) 119582.
- [30] J.H. Jo, C.O. Lee, G.Y. Ryu, H. Jae, D. Roh, W.S. Chi, Hierarchical Amine-Functionalized ZIF-8 Mixed-Matrix Membranes with an Engineered Interface and Transport Pathway for Efficient Gas Separation, *ACS Appl. Polym. Mater.* 4 (2022) 6426.

- [31] V. Nafisi, M.B. Hägg, Gas Separation Properties of ZIF-8/6FDA-Durene Diamine Mixed Matrix Membrane, *Sep. Purif. Technol.* 128 (2014) 31.
- [32] Y. Fan, H. Yu, S. Xu, Q. Shen, H. Ye, N. Li, Zn(II)-modified imidazole containing polyimide/ZIF-8 mixed matrix membranes for gas separations, *J. Membr. Sci.* 597 (2020).
- [33] N. Tien-Binh, H. Vinh-Thang, X.Y. Chen, D. Rodrigue, S. Kaliaguine, Crosslinked MOF-polymer to enhance gas separation of mixed matrix membranes, *J. Membr. Sci.* 520 (2016) 941-950.
- [34] M. Khdayyer, A.F. Bushell, P.M. Budd, M.P. Attfield, D. Jiang, A.D. Burrows, E. Esposito, P. Bernardo, M. Monteleone, A. Fuoco, G. Clarizia, F. Bazzarelli, A. Gordano, J.C. Jansen, Mixed matrix membranes based on MIL-101 metal-organic frameworks in polymer of intrinsic microporosity PIM-1, *Sep. Purif. Technol.* 212 (2019) 545-554.
- [35] H. Yin, A. Alkaş, Y. Zhang, Y. Zhang, S.G. Telfer, Mixed matrix membranes (MMMs) using an emerging metal-organic framework (MUF-15) for CO<sub>2</sub> separation, *J. Membr. Sci.* 609 (2020).
- [36] N. Tien-Binh, D. Rodrigue, S. Kaliaguine, In-situ cross interface linking of PIM-1 polymer and UiO-66-NH<sub>2</sub> for outstanding gas separation and physical aging control, *J. Membr. Sci.* 548 (2018) 429-438.
- [37] M. Yahia, L.A. Lozano, J.M. Zamaro, C. Téllez, J. Coronas, Microwave-assisted synthesis of metal-organic frameworks UiO-66 and MOF-808 for enhanced CO<sub>2</sub>/CH<sub>4</sub> separation in PIM-1 mixed matrix membranes, *Sep. Purif. Technol.* 330 (2024).
- [38] Q. Zhao, Y. Sun, J. Zhang, F. Fan, T. Li, G. He, C. Ma, Mixed matrix membranes incorporating amino-functionalized ZIF-8-NH<sub>2</sub> in a carboxylic polyimide for molecularly selective gas separation, *J. Membr. Sci.* 693 (2024).
